# Supplementary material for: Whole-exome sequencing in eccrine porocarcinoma indicates promising therapeutic strategies
Source: PubMed Central journal article supplement (PMC9209330; doi:10.1038/s41417-021-00347-z), 2021-05-27
Supplement: 41417_2021_347_MOESM1_ESM.pdf [file 41417_2021_347_MOESM1_ESM.pdf]

# Supporting information

## Whole-exome sequencing in eccrine porocarcinoma indicates promising therapeutic strategies

Evgeniya Denisova<sup>1</sup>, Dana Westphal<sup>2,3</sup>, Harald M. Surowy<sup>4</sup>, Friedegund Meier<sup>2,3</sup>, Barbara Hutter<sup>1,5</sup>, Julia Reifenberger<sup>6</sup>, Arno Rütten<sup>7</sup>, Alexander Schulz<sup>3</sup>, Mildred Sergon<sup>8</sup>, Mirjana Ziemer<sup>9</sup>, Benedikt Brors<sup>1,10,11</sup>, Regina C. Betz<sup>12,\*</sup>, Silke Redler<sup>4,\*,#</sup>

<sup>1</sup>Division of Applied Bioinformatics, German Cancer Research Center (DKFZ), Heidelberg, Germany

<sup>2</sup>Department of Dermatology, Carl Gustav Carus Medical Center, TU Dresden, Dresden, Germany

<sup>3</sup>National Centre for Tumour Diseases (NCT), Partner Site Dresden, Germany

<sup>4</sup>Institute of Human Genetics, Medical Faculty and University Hospital Düsseldorf, Heinrich-Heine-University Düsseldorf, Germany

<sup>5</sup>Computational Oncology, Molecular Diagnostics Program, National Center for Tumor Diseases (NCT), Heidelberg, Germany

<sup>6</sup>Department of Dermatology, University Hospital Düsseldorf, Düsseldorf, Germany

<sup>7</sup>Dermatopathology, Bodensee, Siemensstrasse 6/1, 88048 Friedrichshafen, Germany

<sup>8</sup>Institute of Pathology, Carl Gustav Carus Medical Center, TU Dresden, Dresden, Germany

<sup>9</sup>Department of Dermatology, Venereology and Allergology, University Medical Center, Leipzig, Germany

<sup>10</sup>National Center for Tumor Diseases (NCT), Heidelberg, Germany

<sup>11</sup>German Cancer Consortium (DKTK), Heidelberg, Germany

<sup>12</sup>Institute of Human Genetics, University of Bonn, Medical Faculty & University Hospital Bonn, Bonn, Germany

\*contributed equally.

### #Correspondence to:

Prof Silke Redler, MD

Institute of Human Genetics

University of Düsseldorf

Universitätsstr. 1

D-40225 Düsseldorf

Germany

Phone: +49 211 81 10423

Fax: +49 211 81 12358

Email: [silke.redler@med.uni-duesseldorf.de](mailto:silke.redler@med.uni-duesseldorf.de)

## Supporting Information

**Supplemental Fig. 1:** Immunohistochemistry and Western Blot analyses of BRCA2-expressing cells treated with BRCA2 siRNA confirm BRCA2 antibody specificity.

The BRCA2 expressing prostata carcinoma cells line LNCAP was treated for 48 h with 43 nM BRCA2 siRNA (siBRCA2, 5'-CCAACUUUGUCCUUAACUA-3', Eurofins) or scrambled siRNA (siSCR, 5'-GCAGCUAUAUGAAUGUUGU-3', Eurofins), according to the Lipofectamine RNAiMAX protocols. **a**, In immunohistochemical analyses, LNCAP cells treated with the BRCA2 siRNA show almost no BRCA2 protein expression. Treated cells were resuspended in HistoGel (#HG4000012, ThermoFisher) in accordance with the manufacturers' protocols, then fixed with 4% formalin and embedded in paraffin. One  $\mu\text{m}$  sections of these cell blocks were stained for BRCA2 (see Methods section in main text). Representative images at 100x and 400x (inlays) magnification were taken of the siSCR (left panel) and siBRCA2 (right panel) treated cells showing strong and no BRCA2 staining, respectively. **b**, In Western blot analyses, LNCAP cells treated with the BRCA2 siRNA do not display any discernible BRCA2 protein band at 380 kDa. Treated cells were lysed in IP-lysis buffer (50 mM Hepes, pH7.5; 150 mM NaCl; 10% glycerol; 1% Triton-X-100; 1.5 mM  $\text{MgCl}_2$ ; 1 mM EDTA). 25 and 50  $\mu\text{g}$  protein were loaded onto 4-20% gradient gels (#456-1083, BioRad) and blotted onto nitrocellulose membranes (#170-4159, BioRad). Membranes were incubated with BRCA2 (#10741) or GAPDH (#2118) antibodies from Cell Signaling at a 1:1000 dilution o/n at 4°C, followed by an incubation with a HRP-conjugated, rabbit secondary antibody (#NA934, GE Healthcare) at 1:3000 dilution for 1 h at RT. Proteins were detected with Dura Extended Duration substrate (#34075, Thermo Fisher Scientific) and visualised using the ImageQuant LAS 4000 detection system (GE Healthcare). Images of the uncut BRCA2- (left panel) and GAPDH- (right panel) stained membranes are shown. \*is a non-specific band at 35 kDa detected with the BRCA2 antibody.

**Supplemental table 1:** Whole-exome sequencing coverage statistics

**Supplemental table 2:** Tumour-specific coding single nucleotide variants

**Supplemental table 3:** Tumour-specific coding small indels

**Supplemental table 4:** Recurrent tumour-specific copy number gains and losses

**Supplemental table 5:** Mutational signatures of the single tumours.

Supplemental Figure 1

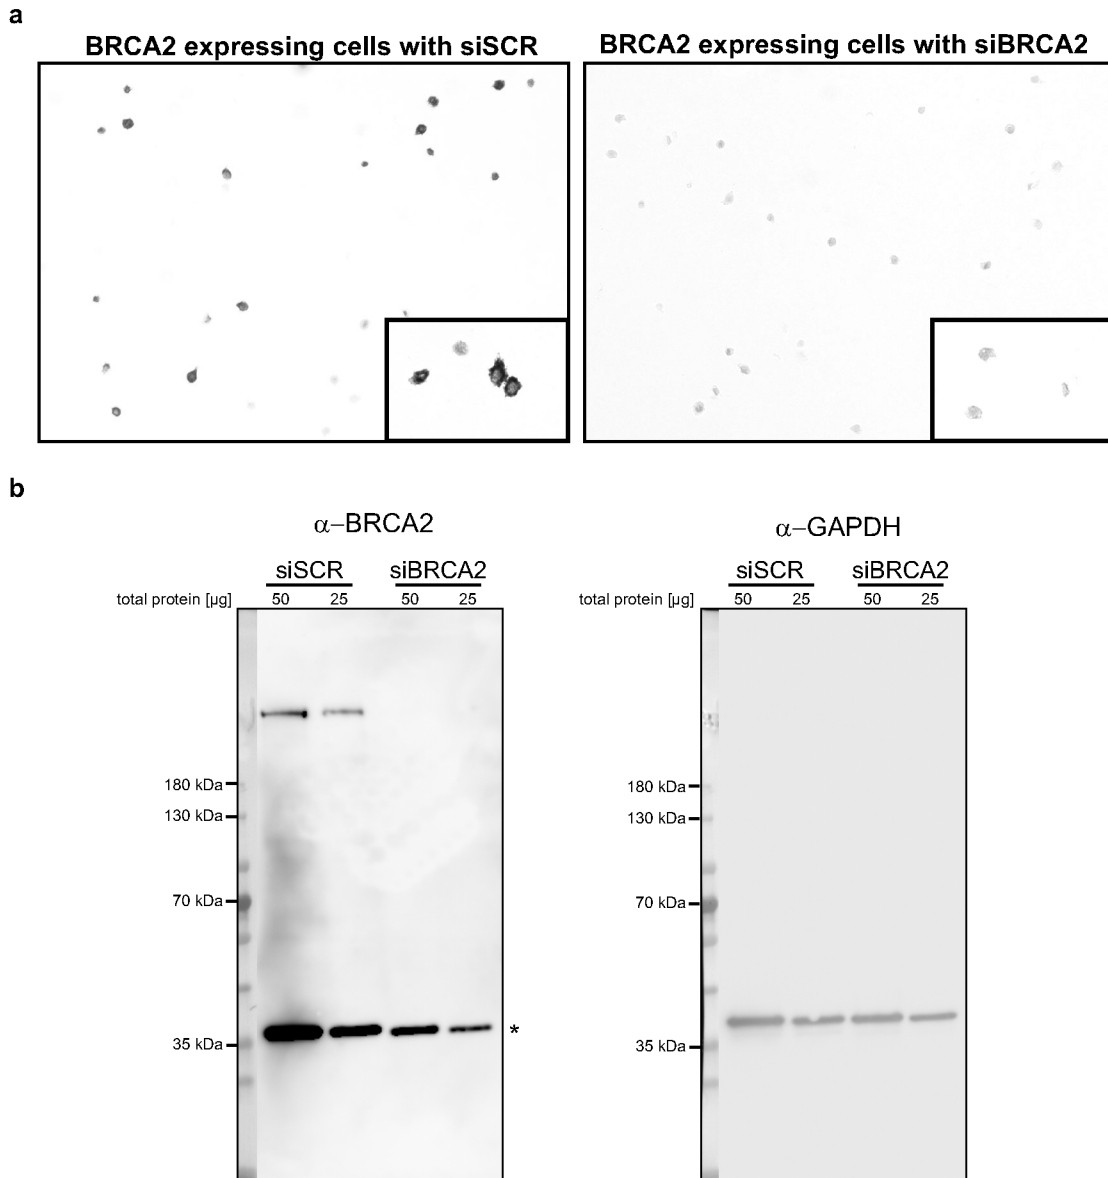

**Supplemental Fig. 1: Immunohistochemistry and Western blot analyses of BRCA2 expressing cells treated with BRCA2 siRNA confirm BRCA2 antibody specificity.** The BRCA2 expressing prostate carcinoma cells line LNCAP was treated for 48 h with 43 nM BRCA2 siRNA (siBRCA2, 5'-CCAACUUUGUCCUUAACUA-3', Eurofins) or scrambled siRNA (siSCR, 5'-GCAGCUAUAUGAAUGUUGU-3', Eurofins), according to the Lipofectamine RNAiMAX protocols. **a**, In immunohistochemical analyses, LNCAP cells treated with the BRCA2 siRNA show hardly any BRCA2 protein expression. Treated cells were resuspended in HistoGel (#HG400012, ThermoScientific) following the manufacturers' protocols, then fixed with 4% formalin and embedded in paraffin. One  $\mu$ m sections of these cell blocks were stained for BRCA2 (see method section in main text). Representative images at 100x and 400x (inlays) magnification were taken of the siSCR (left panel) and siBRCA2 (right panel) treated cells showing strong and no BRCA2 staining, respectively. **b**, In Western blot analyses, LNCAP cells treated with the BRCA2 siRNA do not display any discernible BRCA2 protein band at 380 kDa. Treated cells were lysed in IP-lysis buffer (50 mM Hepes, pH7.5; 150 mM NaCl; 10% glycerol; 1% Triton-X-100; 1.5 mM MgCl<sub>2</sub>; 1 mM EDTA). 25 and 50  $\mu$ g protein were loaded onto 4-20% gradient gels (#456-1083, BioRad) and blotted onto nitrocellulose membranes (#170-4159, BioRad). Membranes were incubated with BRCA2 (#10741) or GAPDH (#2118) antibodies from Cell Signaling at a 1:1000 dilution o/n at 4°C, followed by an incubation with a HRP-conjugated, rabbit secondary antibody (#NA934, GE Healthcare) at 1:3000 dilution for 1 h at RT. Proteins were detected with Dura Extended Duration substrate (#34075, Thermo Fisher Scientific) and visualized using the ImageQuant LAS 4000 detection system (GE Healthcare). Images of the uncut BRCA2- (left panel) and GAPDH- (right panel) stained membranes are shown. \*is a non-specific band at 35 kDa detected with the BRCA2 antibody.

**Supplemental Table 1: Whole-exome sequencing coverage statistics\***

| Patient ID   | Sample Type | Coverage | Mapped Reads % | Duplicates% | Properly Paired% | Insert Size (Median) |
|--------------|-------------|----------|----------------|-------------|------------------|----------------------|
| C000-2SXE39  | CONTROL     | 224,98   | 99,99          | 33,68       | 97,55            | 149                  |
| C000-2SXE39  | TUMOR       | 278,03   | 99,99          | 24,65       | 96,87            | 162                  |
| C000-648QQH  | CONTROL     | 78,02    | 99,99          | 68,38       | 96,97            | 132                  |
| C000-648QQH  | TUMOR       | 71,98    | 99,99          | 67,19       | 97,27            | 134                  |
| C000-6KNGDL  | CONTROL     | 108,14   | 99,98          | 55,07       | 96,58            | 137                  |
| C000-6KNGDL  | TUMOR       | 178,62   | 99,98          | 29,92       | 91,94            | 135                  |
| C000-AX1WLG  | CONTROL     | 257,71   | 99,99          | 28,49       | 97,93            | 161                  |
| C000-AX1WLG  | TUMOR       | 243,26   | 99,99          | 23,6        | 97,78            | 159                  |
| C000-CFLP5N  | CONTROL     | 34,15    | 99,97          | 80,74       | 95,23            | 120                  |
| C000-CFLP5N  | TUMOR       | 35,65    | 99,98          | 81,84       | 96,05            | 120                  |
| C000-ESMKCH  | CONTROL     | 37,32    | 99,98          | 78,11       | 94,86            | 123                  |
| C000-ESMKCH  | TUMOR       | 54,64    | 99,99          | 72,62       | 96,74            | 123                  |
| C000-EXKBCS  | CONTROL     | 221,06   | 99,98          | 41,05       | 96,97            | 152                  |
| C000-EXKBCS  | TUMOR       | 176,44   | 99,99          | 45,4        | 96,91            | 149                  |
| C000-HZGGV2  | CONTROL     | 113,57   | 99,98          | 56,14       | 95,87            | 132                  |
| C000-HZGGV2  | TUMOR       | 145,67   | 99,99          | 43,49       | 94,66            | 126                  |
| C000-JMUDMJ  | CONTROL     | 170,8    | 99,99          | 45,81       | 97,68            | 148                  |
| C000-JMUDMJ  | TUMOR       | 169,39   | 99,99          | 45,27       | 97,25            | 147                  |
| C000-RCWM1J  | CONTROL     | 77,21    | 99,96          | 58,57       | 93,74            | 133                  |
| C000-RCWM1J  | TUMOR       | 185,73   | 99,98          | 24,87       | 90,85            | 137                  |
| C000-S5ZHWR  | CONTROL     | 144,49   | 99,98          | 47,84       | 97,31            | 144                  |
| C000-S5ZHWR  | TUMOR       | 237,27   | 99,99          | 35,62       | 97,04            | 151                  |
| C000-W91YB6  | CONTROL     | 155,08   | 99,99          | 40,2        | 97,87            | 149                  |
| C000-W91YB6  | TUMOR       | 287,49   | 99,99          | 34,14       | 97,72            | 146                  |
| C000-X88E7Z  | CONTROL     | 162,19   | 99,98          | 33,21       | 97,58            | 149                  |
| C000-X88E7Z  | TUMOR       | 488,43   | 99,99          | 48,13       | 96,17            | 140                  |
| C000-ZZP8UU  | CONTROL     | 87,77    | 99,99          | 65,91       | 96,17            | 125                  |
| C000-ZZP8UU  | TUMOR       | 60,2     | 99,98          | 78,65       | 95,36            | 125                  |
| C000-XWCDE5* | CONTROL     | 4,76     | 99,95          | 91,63       | 97,29            | 110                  |
| C000-XWCDE5* | TUMOR       | 19,05    | 99,97          | 88,5        | 97,06            | 115                  |
| C000-DZCVJ8* | CONTROL     | 19,49    | 99,96          | 88,44       | 95,27            | 117                  |
| C000-DZCVJ8* | TUMOR       | 14,61    | 99,97          | 91,27       | 97,59            | 116                  |

\*samples with a median coverage of < 20X. Those were excluded from the analysis.







|   |           |   |   |            |            |        |         |                   |                                                                                                                                                                                                                                                                        |
|---|-----------|---|---|------------|------------|--------|---------|-------------------|------------------------------------------------------------------------------------------------------------------------------------------------------------------------------------------------------------------------------------------------------------------------|
| X | 4158623   | T | A | TGGATTGCCA | AAGCCGCTAT | exonic | GPR82   | nonsynonymous SNV | GPR82:ENST00000302548.4:exon3:c.T344A:p.L115K                                                                                                                                                                                                                          |
| X | 60763355  | C | A | GCAGTCGGCC | TGGAGTGCCA | exonic | AR      | nonsynonymous SNV | AR:ENST00000396044.3:exon1:c.C367A:p.L123M,AR:ENST00000374690.3:exon1:c.C367A:p.L123M,AR:ENST00000514029.1:exon1:c.C367A:p.L123M,AR:ENST00000504326.1:exon1:c.C367A:p.L123M,                                                                                           |
| X | 68749626  | G | T | CAACAAGCCC | CCCTGCTGCC | exonic | FAM155B | nonsynonymous SNV | FAM155B:ENST00000252338.4:exon3:c.G1246T:p.A416S,                                                                                                                                                                                                                      |
| X | 107977066 | G | T | CCCTCCCCAG | AACTTTCCA  | exonic | IRS4    | nonsynonymous SNV | IRS4:ENST00000372129.2:exon1:c.C2508A:p.L837M,                                                                                                                                                                                                                         |
| X | 107977067 | G | T | CCCTCCCCAG | AACTTTCCA  | exonic | IRS4    | nonsynonymous SNV | IRS4:ENST00000372129.2:exon1:c.C2508A:p.L836L,                                                                                                                                                                                                                         |
| X | 144904814 | C | A | TACAATGAAT | CTGCTCTCAA | exonic | SLITRK2 | nonsynonymous SNV | SLITRK2:ENST00000335565.4:exon5:c.C871A:p.P291T,SLITRK2:ENST00000413937.2:exon3:c.C871A:p.P291T,SLITRK2:ENST00000447897.2:exon2:c.C871A:p.P291T,SLITRK2:ENST00000434188.2:exon3:c.C871A:p.P291T,SLITRK2:ENST00000370490.1:exon1:c.C871A:p.P291T,SLITRK2:ENST0000042891 |
| X | 151900103 | C | A | GTCTCCCTC  | CATCAGATGC | exonic | MAGEA12 | nonsynonymous SNV | MAGEA12:ENST00000393900.3:exon3:c.G698T:p.G233V,MAGEA12:ENST00000357916.4:exon2:c.G698T:p.G233V,MAGEA12:ENST00000393869.3:exon3:c.G698T:p.G233V,                                                                                                                       |



**Cytoband**    **COSMIC**  
1p36.33    -  
1p36.32    -  
1p36.31    -  
1p36.12    -  
1p35.3    -  
1p34.3    -  
1p34.3    -  
1p34.3    -  
1p32.3    -  
1p31.3    -  
1p31.1    -  
1p31.1    -  
1p31.1    -  
1p22.2    -  
1p22.1    -  
1p21.3    PAP2D,basechange=c.498G>T,AAchangr  
1p21.1    -  
1p21.1    -  
1p13.2    BCAS2,basechange=c.445G>A,AAchangr  
1p12    -  
1q21.3    -  
1q21.3    -  
1q21.3    -  
1q22    -  
1q23.1    -  
1q23.1    -  
1q23.1    -  
1q23.1    -  
1q23.2    -  
1q23.3    -  
1q24.1    -  
1q24.2    -  
1q25.2    -  
1q25.3    -  
1q31.3    -  
1q31.3    -  
1q31.3    -  
1q32.1    -  
1q41    -  
1q41    USH2A,basechange=c.3571G>T,AAchangr  
1q41    TGF2B2,basechange=c.1000036692G>A,AAchangr  
1q42.12    -  
1q42.13    -  
1q43    -  
1q43    -  
1q44    -  
1q44    -  
1q44    OR2T8,basechange=c.889G>A,AAchangr  
1q44    -  
1q44    -  
2p25.3    -  
2p25.3    -  
2p25.3    -  
2p24.3    -  
2p24.1    -  
2p24.1    -  
2p23.3    -  
2p23.3    -  
2p23.1    -  
2p11.2    -  
2q11.2    -  
2q12.1    -  
2q12.1    -  
2q21.1    -  
2q21.2    -  
2q23.3    NEB,basechange=c.10000397345G>A,AAchangr  
2q23.3    -  
2q24.2    -  
2q31.1    -  
2q31.2    -  
2q31.2    -  
2q31.2    -  
2q31.2    -  
2q32.2    COL5A2,basechange=c.1834G>T,AAchangr  
2q32.2    -  
2q33.1    -  
2q33.1    -  
2q33.3    -  
2q33.3    -  
2q34    -  
2q35    -  
2q35    -  
2q36.3    -  
2q37.1    -  
2q37.1    -  
2q37.3    -  
2q37.3    -  
3p25.3    -  
3p25.1    -  
3p22.1    -  
3p13    -  
3p12.3    -  
3q11.1    -  
3q11.2    -  
3q11.2    -  
3q12.1    -  
3q13.2    SPICE1,basechange=c.1855G>A,AAchangr  
3q13.31    -  
3q21.3    -  
3q22.1    -  
3q22.2    EPHB1,basechange=c.144C>T,AAchangr  
3q22.2    -  
3q22.3    -  
3q23    -  
3q24    -  
3q24    -  
3q24    -  
3q25.1    -  
3q25.31    -  
3q26.1    -  
3q26.1    -  
3q26.1    SI,basechange=c.1639G>A,AAchangr  
3q27.1    -  
3q27.1    -  
3q27.2    -  
3q28    FGF12,basechange=c.173G>A,AAchangr  
3q29    -  
4p16.1    -  
4p15.31    -  
4p11    -  
4p11    -  
4q13.1    -  
4q13.3    -  
4q13.3    -  
4q21.21    -  
4q24    TACR3,basechange=c.1297G>T,AAchangr  
4q25    -  
4q26    -  
4q26    -  
4q28.3    -  
4q31.21    -  
4q31.22    -  
4q31.3    -  
4q32.1    -  
4q32.1    -  
4q33    -

4q34.2 .  
5p15.33 .  
5p15.32 .  
5p14.3 .  
5p13.2 .  
5p13.1 .  
5p13.1 .  
5q11.2 .  
5q12.3 .  
5q13.3 .  
5q15 .  
5q11 .  
5q23.3 .  
5q23.3 .  
5q31.1 .  
5q31.3 .  
5q2 .  
5q33.1 .  
5q33.1 .  
5q34 .  
5q35.1 .  
6p25.3 .  
6p25.3 .  
6p22.3 .  
6p22.2 .  
6p22.1 .  
6p22.1 .  
6p21.33 .  
6p21.33 .  
6p21.31 .  
6p21.1 .  
6p21.1 .  
6p21.1 .  
6p12.1 .  
6q12 .  
6q14.1 .  
6q15 .  
6q16.1 .  
6q22.1 .  
6q22.1 .  
6q22.31 .  
6q22.31 .  
6q23.1 .  
6q23.2 .  
6q25.2 .  
6q25.2 .  
6q25.3 .  
6q25.3 .  
6q27 .  
7p21.1 .  
7p21.3 .  
7p21.3 .  
7p21.3 .  
7p21.1 .  
7p15.3 DNAH11.basechange=c.6536T>C:AAchar  
7p15.2 .  
7p14.1 .  
7p13 .  
7p13 .  
7p12.3 .  
7q11.22 .  
7q11.23 .  
7q21.11 .  
7q21.11 .  
7q21.2 .  
7q22.1 .  
7q32.1 .  
7q32.2 .  
7q33 .  
7q33 .  
7q34 .  
7q36.1 .  
7q36.1 .  
7q36.3 .  
7q36.3 .  
8p12 .  
8p11.21 .  
8q12.1 .  
8q13.1 .  
8q21.11 .  
8q23.1 .  
8q23.1 .  
8q23.1 .  
8q23.1 .  
8q23.3 CSMD3.basechange=c.1661G>A:AAchar  
8q24.12 ENPP2\_ENST0000522826.basechange=  
8q24.22 .  
8q24.23 .  
8q24.23 .  
8q24.3 .  
8q24.3 .  
8q24.2 .  
8q22.3 .  
9p21.2 .  
9p13.2 .  
9p11.2 .  
9q21.32 .  
9q22.32 .  
9q22.33 .  
9q22.33 .  
9q22.33 .  
9q31.1 .  
9q31.1 .  
9q31.1 .  
9q32 .  
10p14 .  
10p13 .  
10p13 .  
10p13 .  
10p12.33 .  
10p12.31 .  
10p12.1 .  
10q11.22 .  
10q11.23 .  
10q21.2 .  
10q22.2 .  
10q23.1 .  
10q23.1 .  
10q23.1 .  
10q25.3 .  
10q25.3 .  
10q26.3 .  
10q26.3 .  
10q26.3 .  
11p15.5 .  
11p15.4 .  
11p15.4 .  
11p15.4 .  
11p15.4 .  
11p15.2 .  
11p15.1 .  
11p15.1 .  
11p14.2 ANO3.basechange=c.373C>T:AAchange=  
11p13 .  
11p12 LRRC4C.basechange=c.803C>A:AAchar  
11p12 .  
11p11.2 .  
11p11.2 C1QTNF4.basechange=c.183C>A:AAcha  
11q11.12 .  
11q11 .  
11q12.1 .  
11q22.3 PDGFD\_ENST0000393158.basechange=  
11q24.1 .

11q24.2 .  
11q24.2 .  
11q24.2 .  
12p13.33 KDM5A;basechange=c.3470G>A;AAChan  
12p13.31 .  
12p13.2 .  
12p12.1 .  
12q12 .  
12q12 .  
12q12 .  
12q12 .  
12q12 .  
12q13.12 .  
12q13.13 .  
12q13.2 .  
12q15 .  
12q21.2 .  
12q21.31 .  
12q21.33 .  
12q22 .  
12q23.1 .  
12q23.2 .  
12q23.3 .  
12q24.13 .  
12q24.13 .  
12q24.31 .  
12q24.33 .  
13q12.12 .  
13q12.3 .  
13q13.1 .  
13q13.3 .  
13q14.11 .  
13q21.33 .  
13q32.1 .  
13q32.1 .  
13q34 COL4A2;basechange=c.4229G>A;AAChar  
14q11.2 .  
14q11.2 .  
14q11.2 .  
14q21.1 .  
14q21.2 .  
14q21.3 .  
14q22.2 .  
14q23.3 .  
14q24.2 .  
14q24.2 .  
14q32.12 .  
14q32.12 .  
14q32.33 .  
15q11.2 .  
15q11.2 .  
15q11.2 .  
15q11.2 .  
15q15.3 .  
15q21.3 .  
15q21.3 .  
15q22.1 .  
15q22.31 .  
15q25.1 .  
15q25.1 .  
15q25.2 .  
16p13.3 .  
16p13.3 .  
16p11.2 .  
16p11.2 .  
16p11.2 .  
16q12.1 .  
16q12.1 .  
16q12.1 .  
16q13 .  
16q21 .  
16q21 .  
16q24.3 .  
17p13.2 .  
17p13.2 .  
17p13.1 TP53\_ENST00000545858;basechange=c  
17p13.1 .  
17p13.1 .  
17p13.1 .  
17p13.1 .  
17p11.2 .  
17p11.2 .  
17p11.2 .  
17q11.2 .  
17q11.2 .  
17q11.2 .  
17q11.2 .  
17q21.31 .  
17q22 .  
17q22 .  
17q23.2 .  
17q23.2 .  
17q25.1 .  
17q25.1 .  
17q25.1 .  
17q25.3 .  
18p11.32 .  
18p11.31 .  
18p11.22 .  
18p11.21 .  
18q12.2 .  
18q21.31 .  
19p13.3 .  
19p13.3 .  
19p12 .  
19p12 .  
19p12 .  
19q13.11 .  
19q13.11 .  
19q13.11 CEBPA;basechange=c.573C>T;AAchang  
19q13.12 .  
19q13.12 .  
19q13.2 DLL3;basechange=c.661C>T;AAChange=  
19q13.2 .  
19q13.2 TME145;basechange=c.447G>T;AACha  
19q13.33 .  
19q13.41 .  
19q13.42 .  
19q13.42 .  
19q13.43 .  
19q13.43 .  
19q13.43 .  
20p13 .  
20p12.2 PLCB4;basechange=c.2723A>T;AAchang  
20p11.23 .  
20q11.21 .  
20q13.12 .  
20q13.13 .  
20q13.13 .  
20q13.32 .  
20q13.32 .  
20q13.33 .  
21q22.2 .  
21q22.3 COL6A1;basechange=c.2428T>G;AAChar  
21q22.3 .  
22q11.21 .  
22q11.21 .  
22q11.22 .  
22q13.1 .  
22q13.33 .  
Xp22.33 .  
Xp11.4 .  
Xp11.4 .

Xp11.4 .  
Xp11.4 .  
Xq12 .  
Xq13.1 FAM155B:basechange=c.1246G>T;AACh;  
Xq22.3 IRS4:basechange=c.2509C>A;AAChange;  
Xq27.3 .  
Xq27.3 .  
Xq28 .

COGONOMY

Table with 5 columns: Chromosome, Position (Pg), Reference allele, Mutant allele, Sequence context, and ANNOVAR function. Contains genomic data for various chromosomes and positions.

Table with 3 columns: Mutation type, ANNOVAR output (transcript), and Cytosine/CGMCG. Contains detailed mutation information and associated genomic features.

































10

C16\_ENST0000031986:basechange=c.12836C>A:AAchange=p.P4279H:issue=lung&MUC16\_ENST00000397910:basechange=c.25937C>A:AAchange=p.P8646H:issue=lung

11

| Chromosome | Position (hg1) | Reference | all Mutant allele | Sequence context      | ANNOVAR function | Gene    | Mutation type     | ANNOVAR output (alternative transcripts)                                                                                                                                                                                                                                                                                                                                                                                                                       | Cytoband | COSMIC                                                 |
|------------|----------------|-----------|-------------------|-----------------------|------------------|---------|-------------------|----------------------------------------------------------------------------------------------------------------------------------------------------------------------------------------------------------------------------------------------------------------------------------------------------------------------------------------------------------------------------------------------------------------------------------------------------------------|----------|--------------------------------------------------------|
| 2          | 152584365      | G         | C                 | GGAAGTTCTATTGTCATA    | exonic           | NEB     | stopgain          | NEB:ENST00000427231.2:exon5:c.134G>S45X;NEB:ENST00000397345.3:exon5:c.134G>S45X;NEB:ENST0000064884.1:exon3:c.134G>S45X;NEB:ENST00000303839.1:exon3:c.134G>S45X;NEB:ENST00000409198.1:exon5:c.134G>S45X;NEB:ENST00000172853.10:exon5:c.134G>S45X;ZSWIM2:ENST00000295131.2:exon4:c.G344A;p.R115Q,                                                                                                                                                                | 2q23.3   | -                                                      |
| 2          | 187703836      | C         | T                 | AGTTTGAACACTGATGATCCC | exonic           | ZSWIM2  | nonsynonymous SNV | ZSWIM2:ENST00000295131.2:exon4:c.G344A;p.R115Q,                                                                                                                                                                                                                                                                                                                                                                                                                | 2q32.1   | -                                                      |
| 5          | 35800251       | T         | C                 | GCAGAAAAGGAAATTGCATTC | splicing         | SPEF2   | -                 | SPEF2:ENST00000356031.3:exon34:c.5010+2T>C;ENST00000440985.2:exon34:c.4995+2T>C;ENST00000506526.1:exon12:c.2629+2T>C;ENST00000303129.4:exon10:c.1401+2T>C;ENST00000513078.1:exon10:c.1625+2T>C)                                                                                                                                                                                                                                                                | 5p13.2   | -                                                      |
| 6          | 25850052       | C         | A                 | ATATCTAAGAATTGATATAA  | exonic           | SLC17A3 | nonsynonymous SNV | SLC17A3:ENST00000397060.4:exon10:c.G1252T;p.V418F,                                                                                                                                                                                                                                                                                                                                                                                                             | 6p22.2   | -                                                      |
| 6          | 30916386       | C         | T                 | TCACATATTTCCCTCACTCC  | exonic           | DPCR1   | nonsynonymous SNV | DPCR1:ENST00000462448.1:exon2:c.C145T;p.P49S,                                                                                                                                                                                                                                                                                                                                                                                                                  | 6p21.33  | -                                                      |
| 7          | 123152327      | G         | A                 | AGTATCAAAA.CATCATCACT | exonic           | IQUB    | nonsynonymous SNV | IQUB:ENST00000434450.1:exon2:c.C68T;p.A23V;IQUB:ENST00000324698.6:exon2:c.C68T;p.A23V;IQUB:ENST00000405057.1:exon2:c.C68T;p.A23V;IQUB:ENST00000466202.1:exon2:c.C68T;p.A23V;IQUB:ENST00000444508.1:exon2:c.C68T;p.A23V,                                                                                                                                                                                                                                        | 7q31.32  | -                                                      |
| 8          | 113668499      | C         | T                 | ATTGTAAGAT.CAAGCAAGGG | exonic           | CSMD3   | nonsynonymous SNV | CSMD3:ENST00000339701.3:exon5:c.G908A;p.G303E;CSMD3:ENST00000297405.5:exon18:c.G2888A;p.G963E;CSMD3:ENST00000343508.3:exon19:c.G2788A;p.G923E;CSMD3:ENST00000455883.2:exon17:c.G2576A;p.G859E;CSMD3:ENST00000352409.3:exon18:c.G2888A;p.G963E,                                                                                                                                                                                                                 | 8q23.3   | CSMD3:basechange=c.2888G>T;AAchange=p.G863V;issue=lung |
| 11         | 8496269        | C         | T                 | ATAATTTTTT.TTTTTTCTC  | exonic           | STK33   | nonsynonymous SNV | STK33:ENST00000396673.1:exon3:c.G184A;p.E62K;STK33:ENST00000447869.1:exon1:c.G184A;p.E62K;STK33:ENST00000431279.2:exon3:c.G184A;p.E62K;STK33:ENST00000534493.1:exon3:c.G61A;p.E21K;STK33:ENST00000396673.1:exon3:c.G184A;p.E62K;STK33:ENST00000418597.1:exon2:c.G61A;p.E21K;STK33:ENST00000457885.2:exon2:c.G184A;p.E62K;STK33:ENST00000524760.1:exon1:c.G34A;p.E12K;STK33:ENST00000422559.2:exon3:c.G61A;p.E21K;STK33:ENST00000315294.1:exon3:c.G184A;p.E62K, | 11p15.4  | -                                                      |
| 14         | 24780924       | G         | A                 | GATGGAGAAACGGTCCCGA   | exonic           | LTB4R2  | nonsynonymous SNV | LTB4R2:ENST00000533293.1:exon2:c.G1054A;p.D352N;LTB4R2:ENST00000528054.1:exon1:c.G1147A;p.D383N;LTB                                                                                                                                                                                                                                                                                                                                                            | 14q12    | -                                                      |
| 19         | 10480547       | G         | T                 | GTGAACCCC.TCTCTACTAA  | exonic           | TYK2    | nonsynonymous SNV | 4R2:ENST00000543919.1:exon2:c.G1054A;p.D352N,                                                                                                                                                                                                                                                                                                                                                                                                                  | 19p13.2  | -                                                      |
| 22         | 26224742       | G         | T                 | TCTCTCCCTAATCCTTTTCC  | splicing         | MYO18B  | nonsynonymous SNV | TYK2:ENST00000530829.1:exon4:c.C200A;p.T67K,                                                                                                                                                                                                                                                                                                                                                                                                                   | 22q12.1  | -                                                      |
|            |                |           |                   |                       |                  |         |                   | 1G>T;ENST00000407587.2:exon15:c.2787-1G>T;ENST00000335473.7:exon15:c.2787-1G>T;ENST00000407587.2:exon15:c.2787-1G>T;ENST00000539302.1:exon13:c.2642-1G>T)                                                                                                                                                                                                                                                                                                      |          |                                                        |











Table with 10 columns: Chromosome Position (qRefSeq), Mutant Alleles, Sequence context, ANNOVAR Func, Mutation type, ANNOVAR output (alternative transcripts), Cytoband, COBNC. Contains genomic data for chromosome 10.

Table with 2 columns: Cytoband, COBNC. Contains cytoband and COBNC identifiers for each genomic position.









sechange<4900>AAchangeP.R147QIssueLarge\_inteliv

AAchangeP.Q205EIssueLung

AAchangeP.P220TIssueLung&RES1\_EN010000381486\_basechange<556C>AAchangeP.P220T.IssueLun

FIG-IT\_AAchangeP.E120'IssueMedonmeter

EB9'IssueIn

egje: 16720>TAAChangep.R5MC.IssueEndometriu

300537824.baschangen-c.07150>T.AAChangep.V223F.IssueInge\_Steine

3>T.AAChangep.C1381F.IssueWay

PRD\_ENG1000034816.baschangen-c.4102C>TAAChangep.R109C.IssueBreast.prostate.endometriu&PFRD.baschangen-c.592C>TAAChangep.R109C.IssueBreast.prostate.endometriu&PFRD\_ENG10000381196.baschangen-c.592C>TAAChangep.R109C.IssueBreast.prostate.endometriu

<24660>TAAChangep.G619V.IssueIn



plm-12900-1-Altchange-D4030basechange\_000000

p-11870-basechange\_000000











id\_ympohd\_kesha.stomach\_urinary\_kidney.pancreas.liver.oesophagus.skin.prostate.lung.large\_intestine.endometrium&TTP3\_2N1T0000054668&basecharge=197C-7AACharge=ABV&issue=urinary\_kidney.lung.large\_intestine.endometrium&TTP3\_2N1T0000052831&basecharge=43DC-5AACharge=9Y4F&issue=lung&TTP3\_2N1T0000052502&basecharge=43DC-5AACharge=9Y4F&issue=lung&endometrium

















021120000000000000

021120000000000000

021120000000000000

02050000

1950

910750









AAAHgngy 01099baaangMCCiEbaaazqum 12410AAAHgngy 04478baaang

2260baaang\_thead

2baaang

1102baaangthead

01149baaangthead











bioRxiv preprint doi: <https://doi.org/10.1101/2020.04.15.041313>; this version posted April 15, 2020. The copyright holder for this preprint (which was not certified by peer review) is the author/funder, who has granted bioRxiv a license to display the preprint in perpetuity. It is made available under aCC-BY 4.0 International license.



















Table with 4 columns: Index, Gene Symbol, Gene Name, and Description. The index ranges from 2 to 54. Gene symbols include various mitochondrial genes like ATP5B, ATP5C1, ATP5A1, etc. The descriptions provide accession numbers and coordinates for each gene.











age\_intestine

ng&RHBG.basechange=c.285C>T.AAchange=p.L95L.tissue=ovary.lung&RHBG\_ENST00000368246.basechange=c.285C>T.AAchange=p.L95L.tissue=ovary.lung  
ge\_intestine&NTRK1.basechange=c.2074C>T.AAchange=p.R692C.tissue=large\_intestine

ig&OR2L13.basechange=c.793C>T.AAchange=p.R265C.tissue=lung



Sbasechange<1532C>T,AAchange<p.S511F,issue=large\_intestine

mploid\_issue

dometrium&FAT4,basechange<6022C>T,AAchange<p.R2008W,issue=endometrium

lung

xus\_system

KIF6.basechange=c.1494G>T;AAchange=p.M498I.tissue=lung

t

pe=c.662C>T;AAchange=p.S221F.tissue=endometrium

.jpg&CSMD1\_ENST00000537824.basechange=c.7877C>T;AAchange=p.S2626F.tissue=lung

3

change: 113C-AAchange:p.538Y issue:pancreas

IST0000294064.basechange=c.364C>T,AAchange=p.P122S,tissue=large\_intestine

ct

lvary\_gland&ENOX1.basechange=c.724C>A,AAchange=p.R242R,tissue=lung&ENOX1.basechange=c.724C>T,AAchange=p.R242W,tissue=salivary\_gland&ENOX1\_ENST00000261488.basechange=c.724C>A,AAchange=p.R242R,tissue=lung

arge\_intestine.endometrium&DNAH3.basechange=c.3223C>T.AAchange.p.R1075C.tissue=large\_intestine.endometrium

\_intestine&PHKB\_ENST00000323584.basechange=c.707C>T.AAchange.p.S236L.tissue=large\_intestine&PHKB.basechange=c.707C>T.AAchange.p.S236L.tissue=large\_intestine

\_tract&TP53\_ENST00000269305.basechange=c.1001G>T.AAchange.p.G334V.tissue=lung&TP53.basechange=c.1001G>C.AAchange.p.G334A.tissue=lung&TP53\_ENST00000269305.basechange=c.1001G>C.AAchange.p.G334A.tissue=lung

trium

east&MYH14.basechange=c.982C>T.AAchange.p.R328W.tissue=breast

kidney&ZSCAN18.basechange=c.880G>A.AAchange=p.E294K.tissue=kidney

ometrium&FLCB1.basechange=c.1229C>T.AAchange=p.S410L.tissue=endometrium  
00378641.basechange=c.2753C>T.AAchange=p.S918L.tissue=lung

ICK.basechange=c.310G>T.AAchange=p.E104\*  
tissue=lung

am

ometrium&TAF1.basechange=c.3505C>T.AAchange=p.R1169C.tissue=endometrium

















...A... ...B... ...C... ...D... ...E... ...F... ...G... ...H... ...I... ...J... ...K... ...L... ...M... ...N... ...O... ...P... ...Q... ...R... ...S... ...T... ...U... ...V... ...W... ...X... ...Y... ...Z...

...A... ...B... ...C... ...D... ...E... ...F... ...G... ...H... ...I... ...J... ...K... ...L... ...M... ...N... ...O... ...P... ...Q... ...R... ...S... ...T... ...U... ...V... ...W... ...X... ...Y... ...Z...

...A... ...B... ...C... ...D... ...E... ...F... ...G... ...H... ...I... ...J... ...K... ...L... ...M... ...N... ...O... ...P... ...Q... ...R... ...S... ...T... ...U... ...V... ...W... ...X... ...Y... ...Z...

...A... ...B... ...C... ...D... ...E... ...F... ...G... ...H... ...I... ...J... ...K... ...L... ...M... ...N... ...O... ...P... ...Q... ...R... ...S... ...T... ...U... ...V... ...W... ...X... ...Y... ...Z...

...A... ...B... ...C... ...D... ...E... ...F... ...G... ...H... ...I... ...J... ...K... ...L... ...M... ...N... ...O... ...P... ...Q... ...R... ...S... ...T... ...U... ...V... ...W... ...X... ...Y... ...Z...

...A... ...B... ...C... ...D... ...E... ...F... ...G... ...H... ...I... ...J... ...K... ...L... ...M... ...N... ...O... ...P... ...Q... ...R... ...S... ...T... ...U... ...V... ...W... ...X... ...Y... ...Z...



















| Chromosomes/Position (hg) | Reference Allele | Mutant Allele | Sequence Context      | ANNOVAR | Gene    | Mutation Type     | ANNOVAR output (alternative transcripts)                                                                                                                                                                                                                                                                                                                                                                                                                                                                                                                                                                                                                                                                                                                                                                                                                                                                                                                                                                                                                                                                                                                                                                                                                                                                                                                                                                                                                                                                                                                                                                                                                                                                                                                                                                                                                                                                                                                                                                                                                                                                                                                                                                                                                                                                                                                                                                                                                                                                                                                                                                                                                                                                                                                                                                                                                                                                                                                                                                                                                                                                                                                                                                                                                                                                                                                                                                                                                                                                                                                                                                                                                                                                                                                                                                                                                                                                                                                                                                                                                                                                                                                                                                                                                                                                                                                                                                                                                                                                                                                                                                                                                                                                                                                                                                                                                                                                                                                                                                                                                                                                                                                                                                                                                                                                                                                                                                                                                                                                                                                                                                                                                                                                                                                                                                                                                                                                                                                                                                                                                                                                                                                                                                                                                                                                                                                                                                                                                                                                                                                                                                                                                                                                                                                                                                                                                                                                                                                                                                                                                                                                                                                                                                                                                                                                                                                                                                                                                                                                                                                                                                                                                                                                                                                                                                                                                                                                                                                                                                                                                                                                                                                                                                                                                                                                                                                                                                                                                                                                                                                                                                                                                                                                                                                                                                                                                                                                                                                                                                                                                                                                                                                                                                                                                                                                                                                                                                                                                                                                                                                                                                                                                                                                                                                                                                                                                                                                                                                                                                                                                                                                                                                                                                                                                                                                                                                                                                                                                                                                                                                                                                                                               |
|---------------------------|------------------|---------------|-----------------------|---------|---------|-------------------|--------------------------------------------------------------------------------------------------------------------------------------------------------------------------------------------------------------------------------------------------------------------------------------------------------------------------------------------------------------------------------------------------------------------------------------------------------------------------------------------------------------------------------------------------------------------------------------------------------------------------------------------------------------------------------------------------------------------------------------------------------------------------------------------------------------------------------------------------------------------------------------------------------------------------------------------------------------------------------------------------------------------------------------------------------------------------------------------------------------------------------------------------------------------------------------------------------------------------------------------------------------------------------------------------------------------------------------------------------------------------------------------------------------------------------------------------------------------------------------------------------------------------------------------------------------------------------------------------------------------------------------------------------------------------------------------------------------------------------------------------------------------------------------------------------------------------------------------------------------------------------------------------------------------------------------------------------------------------------------------------------------------------------------------------------------------------------------------------------------------------------------------------------------------------------------------------------------------------------------------------------------------------------------------------------------------------------------------------------------------------------------------------------------------------------------------------------------------------------------------------------------------------------------------------------------------------------------------------------------------------------------------------------------------------------------------------------------------------------------------------------------------------------------------------------------------------------------------------------------------------------------------------------------------------------------------------------------------------------------------------------------------------------------------------------------------------------------------------------------------------------------------------------------------------------------------------------------------------------------------------------------------------------------------------------------------------------------------------------------------------------------------------------------------------------------------------------------------------------------------------------------------------------------------------------------------------------------------------------------------------------------------------------------------------------------------------------------------------------------------------------------------------------------------------------------------------------------------------------------------------------------------------------------------------------------------------------------------------------------------------------------------------------------------------------------------------------------------------------------------------------------------------------------------------------------------------------------------------------------------------------------------------------------------------------------------------------------------------------------------------------------------------------------------------------------------------------------------------------------------------------------------------------------------------------------------------------------------------------------------------------------------------------------------------------------------------------------------------------------------------------------------------------------------------------------------------------------------------------------------------------------------------------------------------------------------------------------------------------------------------------------------------------------------------------------------------------------------------------------------------------------------------------------------------------------------------------------------------------------------------------------------------------------------------------------------------------------------------------------------------------------------------------------------------------------------------------------------------------------------------------------------------------------------------------------------------------------------------------------------------------------------------------------------------------------------------------------------------------------------------------------------------------------------------------------------------------------------------------------------------------------------------------------------------------------------------------------------------------------------------------------------------------------------------------------------------------------------------------------------------------------------------------------------------------------------------------------------------------------------------------------------------------------------------------------------------------------------------------------------------------------------------------------------------------------------------------------------------------------------------------------------------------------------------------------------------------------------------------------------------------------------------------------------------------------------------------------------------------------------------------------------------------------------------------------------------------------------------------------------------------------------------------------------------------------------------------------------------------------------------------------------------------------------------------------------------------------------------------------------------------------------------------------------------------------------------------------------------------------------------------------------------------------------------------------------------------------------------------------------------------------------------------------------------------------------------------------------------------------------------------------------------------------------------------------------------------------------------------------------------------------------------------------------------------------------------------------------------------------------------------------------------------------------------------------------------------------------------------------------------------------------------------------------------------------------------------------------------------------------------------------------------------------------------------------------------------------------------------------------------------------------------------------------------------------------------------------------------------------------------------------------------------------------------------------------------------------------------------------------------------------------------------------------------------------------------------------------------------------------------------------------------------------------------------------------------------------------------------------------------------------------------------------------------------------------------------------------------------------------------------------------------------------------------------------------------------------------------------------------------------------------------------------------------------------------------------------------------------------------------------------------------------------------------------------------------------------------------------------------------------------------------------------------------------------------------------------------------------------------------------------------------------------------------------------------------------------------------------------------------------------------------------------------------------------------------------------------------------------------------------------------------------------------------------------------------------------------------------------------------------------------------------------------------------------------------------------------------------------------------------------------------------------------------------------------------------------------------------------------------------------------------------------------------------------------------------------------------------------------------------------------------------------------------------------------------------------------------------------------------------------------------------------------------------------------------------------------------------------------------------------------------------------------------------------------------------------------------------------------------------------------------------------------------------------------------------------------------------------------------------------------------------------------------------------------------------------------------------------------------------------------------------|
| 1                         | 1355494          | C             | TCCGGGGGC_CACCCGGCCC  | exonic  | ANKRD65 | nonsynonymous SNV | ANKRD65:ENST00000357107.1 exon3:c.688A>G;D330N,                                                                                                                                                                                                                                                                                                                                                                                                                                                                                                                                                                                                                                                                                                                                                                                                                                                                                                                                                                                                                                                                                                                                                                                                                                                                                                                                                                                                                                                                                                                                                                                                                                                                                                                                                                                                                                                                                                                                                                                                                                                                                                                                                                                                                                                                                                                                                                                                                                                                                                                                                                                                                                                                                                                                                                                                                                                                                                                                                                                                                                                                                                                                                                                                                                                                                                                                                                                                                                                                                                                                                                                                                                                                                                                                                                                                                                                                                                                                                                                                                                                                                                                                                                                                                                                                                                                                                                                                                                                                                                                                                                                                                                                                                                                                                                                                                                                                                                                                                                                                                                                                                                                                                                                                                                                                                                                                                                                                                                                                                                                                                                                                                                                                                                                                                                                                                                                                                                                                                                                                                                                                                                                                                                                                                                                                                                                                                                                                                                                                                                                                                                                                                                                                                                                                                                                                                                                                                                                                                                                                                                                                                                                                                                                                                                                                                                                                                                                                                                                                                                                                                                                                                                                                                                                                                                                                                                                                                                                                                                                                                                                                                                                                                                                                                                                                                                                                                                                                                                                                                                                                                                                                                                                                                                                                                                                                                                                                                                                                                                                                                                                                                                                                                                                                                                                                                                                                                                                                                                                                                                                                                                                                                                                                                                                                                                                                                                                                                                                                                                                                                                                                                                                                                                                                                                                                                                                                                                                                                                                                                                                                                                                                        |
| 1                         | 1626364          | C             | CGACTTCGT_CCCCTCCGCTG | exonic  | SPFN    | nonsynonymous SNV | SPFN:ENST00000379759.3 exon11:c.C1029G>T;p.394T1L,                                                                                                                                                                                                                                                                                                                                                                                                                                                                                                                                                                                                                                                                                                                                                                                                                                                                                                                                                                                                                                                                                                                                                                                                                                                                                                                                                                                                                                                                                                                                                                                                                                                                                                                                                                                                                                                                                                                                                                                                                                                                                                                                                                                                                                                                                                                                                                                                                                                                                                                                                                                                                                                                                                                                                                                                                                                                                                                                                                                                                                                                                                                                                                                                                                                                                                                                                                                                                                                                                                                                                                                                                                                                                                                                                                                                                                                                                                                                                                                                                                                                                                                                                                                                                                                                                                                                                                                                                                                                                                                                                                                                                                                                                                                                                                                                                                                                                                                                                                                                                                                                                                                                                                                                                                                                                                                                                                                                                                                                                                                                                                                                                                                                                                                                                                                                                                                                                                                                                                                                                                                                                                                                                                                                                                                                                                                                                                                                                                                                                                                                                                                                                                                                                                                                                                                                                                                                                                                                                                                                                                                                                                                                                                                                                                                                                                                                                                                                                                                                                                                                                                                                                                                                                                                                                                                                                                                                                                                                                                                                                                                                                                                                                                                                                                                                                                                                                                                                                                                                                                                                                                                                                                                                                                                                                                                                                                                                                                                                                                                                                                                                                                                                                                                                                                                                                                                                                                                                                                                                                                                                                                                                                                                                                                                                                                                                                                                                                                                                                                                                                                                                                                                                                                                                                                                                                                                                                                                                                                                                                                                                                                                                     |
| 1                         | 1952456          | T             | GCTGAGGGT_ATATCGTCAT  | exonic  | UBR4    | stopgain          | UBR4:ENST0000037256.3 exon2:c.C68T>T;p.148R4;ENST0000375217.2 exon2:c.C68T>T;Q229X,UBR4:ENST0000037526.2 exon2:c.C68T>T;Q229X,                                                                                                                                                                                                                                                                                                                                                                                                                                                                                                                                                                                                                                                                                                                                                                                                                                                                                                                                                                                                                                                                                                                                                                                                                                                                                                                                                                                                                                                                                                                                                                                                                                                                                                                                                                                                                                                                                                                                                                                                                                                                                                                                                                                                                                                                                                                                                                                                                                                                                                                                                                                                                                                                                                                                                                                                                                                                                                                                                                                                                                                                                                                                                                                                                                                                                                                                                                                                                                                                                                                                                                                                                                                                                                                                                                                                                                                                                                                                                                                                                                                                                                                                                                                                                                                                                                                                                                                                                                                                                                                                                                                                                                                                                                                                                                                                                                                                                                                                                                                                                                                                                                                                                                                                                                                                                                                                                                                                                                                                                                                                                                                                                                                                                                                                                                                                                                                                                                                                                                                                                                                                                                                                                                                                                                                                                                                                                                                                                                                                                                                                                                                                                                                                                                                                                                                                                                                                                                                                                                                                                                                                                                                                                                                                                                                                                                                                                                                                                                                                                                                                                                                                                                                                                                                                                                                                                                                                                                                                                                                                                                                                                                                                                                                                                                                                                                                                                                                                                                                                                                                                                                                                                                                                                                                                                                                                                                                                                                                                                                                                                                                                                                                                                                                                                                                                                                                                                                                                                                                                                                                                                                                                                                                                                                                                                                                                                                                                                                                                                                                                                                                                                                                                                                                                                                                                                                                                                                                                                                                                                                                         |
| 1                         | 1556727          | C             | GAATACGCT_AGGGAGCCCA  | exonic  | USP24   | nonsynonymous SNV | USP24:ENST00000294383.6 exon4:c.G5143C;p.E1715Q;USP24:ENST00000407756.1 exon4:c.Q4663C;p.E1555Q,                                                                                                                                                                                                                                                                                                                                                                                                                                                                                                                                                                                                                                                                                                                                                                                                                                                                                                                                                                                                                                                                                                                                                                                                                                                                                                                                                                                                                                                                                                                                                                                                                                                                                                                                                                                                                                                                                                                                                                                                                                                                                                                                                                                                                                                                                                                                                                                                                                                                                                                                                                                                                                                                                                                                                                                                                                                                                                                                                                                                                                                                                                                                                                                                                                                                                                                                                                                                                                                                                                                                                                                                                                                                                                                                                                                                                                                                                                                                                                                                                                                                                                                                                                                                                                                                                                                                                                                                                                                                                                                                                                                                                                                                                                                                                                                                                                                                                                                                                                                                                                                                                                                                                                                                                                                                                                                                                                                                                                                                                                                                                                                                                                                                                                                                                                                                                                                                                                                                                                                                                                                                                                                                                                                                                                                                                                                                                                                                                                                                                                                                                                                                                                                                                                                                                                                                                                                                                                                                                                                                                                                                                                                                                                                                                                                                                                                                                                                                                                                                                                                                                                                                                                                                                                                                                                                                                                                                                                                                                                                                                                                                                                                                                                                                                                                                                                                                                                                                                                                                                                                                                                                                                                                                                                                                                                                                                                                                                                                                                                                                                                                                                                                                                                                                                                                                                                                                                                                                                                                                                                                                                                                                                                                                                                                                                                                                                                                                                                                                                                                                                                                                                                                                                                                                                                                                                                                                                                                                                                                                                                                                                       |
| 1                         | 16272229         | G             | CAACATGCTCA_TGAGGACAT | exonic  | DDR2    | nonsynonymous SNV | DDR2:ENST00000446985.1 exon2:c.G127C;p.D43H;DDR2:ENST00000367922.3 exon5:c.G127C;p.D43H;DDR2:ENST00000367921.3 exon4:c.G127C;p.D43H,                                                                                                                                                                                                                                                                                                                                                                                                                                                                                                                                                                                                                                                                                                                                                                                                                                                                                                                                                                                                                                                                                                                                                                                                                                                                                                                                                                                                                                                                                                                                                                                                                                                                                                                                                                                                                                                                                                                                                                                                                                                                                                                                                                                                                                                                                                                                                                                                                                                                                                                                                                                                                                                                                                                                                                                                                                                                                                                                                                                                                                                                                                                                                                                                                                                                                                                                                                                                                                                                                                                                                                                                                                                                                                                                                                                                                                                                                                                                                                                                                                                                                                                                                                                                                                                                                                                                                                                                                                                                                                                                                                                                                                                                                                                                                                                                                                                                                                                                                                                                                                                                                                                                                                                                                                                                                                                                                                                                                                                                                                                                                                                                                                                                                                                                                                                                                                                                                                                                                                                                                                                                                                                                                                                                                                                                                                                                                                                                                                                                                                                                                                                                                                                                                                                                                                                                                                                                                                                                                                                                                                                                                                                                                                                                                                                                                                                                                                                                                                                                                                                                                                                                                                                                                                                                                                                                                                                                                                                                                                                                                                                                                                                                                                                                                                                                                                                                                                                                                                                                                                                                                                                                                                                                                                                                                                                                                                                                                                                                                                                                                                                                                                                                                                                                                                                                                                                                                                                                                                                                                                                                                                                                                                                                                                                                                                                                                                                                                                                                                                                                                                                                                                                                                                                                                                                                                                                                                                                                                                                                                                                   |
| 1                         | 16803472         | T             | CGACGACAT_CGTTTGACCC  | exonic  | DFAF6   | nonsynonymous SNV | DFAF6:ENST0000031283.6 exon16:c.C231T;p.P771S;DFAF6:ENST0000042587.2 exon18:c.C2491T;p.P831S;DFAF6:ENST0000036784.3 exon17:c.C2371T;p.P791S;DFAF6:ENST0000036784.3 exon19:c.C2584T;p.P862S,                                                                                                                                                                                                                                                                                                                                                                                                                                                                                                                                                                                                                                                                                                                                                                                                                                                                                                                                                                                                                                                                                                                                                                                                                                                                                                                                                                                                                                                                                                                                                                                                                                                                                                                                                                                                                                                                                                                                                                                                                                                                                                                                                                                                                                                                                                                                                                                                                                                                                                                                                                                                                                                                                                                                                                                                                                                                                                                                                                                                                                                                                                                                                                                                                                                                                                                                                                                                                                                                                                                                                                                                                                                                                                                                                                                                                                                                                                                                                                                                                                                                                                                                                                                                                                                                                                                                                                                                                                                                                                                                                                                                                                                                                                                                                                                                                                                                                                                                                                                                                                                                                                                                                                                                                                                                                                                                                                                                                                                                                                                                                                                                                                                                                                                                                                                                                                                                                                                                                                                                                                                                                                                                                                                                                                                                                                                                                                                                                                                                                                                                                                                                                                                                                                                                                                                                                                                                                                                                                                                                                                                                                                                                                                                                                                                                                                                                                                                                                                                                                                                                                                                                                                                                                                                                                                                                                                                                                                                                                                                                                                                                                                                                                                                                                                                                                                                                                                                                                                                                                                                                                                                                                                                                                                                                                                                                                                                                                                                                                                                                                                                                                                                                                                                                                                                                                                                                                                                                                                                                                                                                                                                                                                                                                                                                                                                                                                                                                                                                                                                                                                                                                                                                                                                                                                                                                                                                                                                                                                                            |
| 1                         | 24227125         | A             | TTTGATGTC_GATCCGGGCG  | exonic  | PLD5    | nonsynonymous SNV | PLD5:ENST0000036534.2 exon4:c.T108T;p.L363V;PLD5:ENST0000427465.1 exon3:c.T19G1G;p.L30V;PLD5:ENST0000042994.2 exon2:c.T181G;p.L271V,                                                                                                                                                                                                                                                                                                                                                                                                                                                                                                                                                                                                                                                                                                                                                                                                                                                                                                                                                                                                                                                                                                                                                                                                                                                                                                                                                                                                                                                                                                                                                                                                                                                                                                                                                                                                                                                                                                                                                                                                                                                                                                                                                                                                                                                                                                                                                                                                                                                                                                                                                                                                                                                                                                                                                                                                                                                                                                                                                                                                                                                                                                                                                                                                                                                                                                                                                                                                                                                                                                                                                                                                                                                                                                                                                                                                                                                                                                                                                                                                                                                                                                                                                                                                                                                                                                                                                                                                                                                                                                                                                                                                                                                                                                                                                                                                                                                                                                                                                                                                                                                                                                                                                                                                                                                                                                                                                                                                                                                                                                                                                                                                                                                                                                                                                                                                                                                                                                                                                                                                                                                                                                                                                                                                                                                                                                                                                                                                                                                                                                                                                                                                                                                                                                                                                                                                                                                                                                                                                                                                                                                                                                                                                                                                                                                                                                                                                                                                                                                                                                                                                                                                                                                                                                                                                                                                                                                                                                                                                                                                                                                                                                                                                                                                                                                                                                                                                                                                                                                                                                                                                                                                                                                                                                                                                                                                                                                                                                                                                                                                                                                                                                                                                                                                                                                                                                                                                                                                                                                                                                                                                                                                                                                                                                                                                                                                                                                                                                                                                                                                                                                                                                                                                                                                                                                                                                                                                                                                                                                                                                                   |
| 1                         | 24229767         | T             | GATGCATCG_GTTCTTTTCA  | exonic  | PLD6    | nonsynonymous SNV | PLD6:ENST0000036534.2 exon4:c.T108T;p.L363V;PLD6:ENST0000427465.1 exon3:c.T19G1G;p.L30V;PLD6:ENST000042994.2 exon2:c.T181G;p.L271V,                                                                                                                                                                                                                                                                                                                                                                                                                                                                                                                                                                                                                                                                                                                                                                                                                                                                                                                                                                                                                                                                                                                                                                                                                                                                                                                                                                                                                                                                                                                                                                                                                                                                                                                                                                                                                                                                                                                                                                                                                                                                                                                                                                                                                                                                                                                                                                                                                                                                                                                                                                                                                                                                                                                                                                                                                                                                                                                                                                                                                                                                                                                                                                                                                                                                                                                                                                                                                                                                                                                                                                                                                                                                                                                                                                                                                                                                                                                                                                                                                                                                                                                                                                                                                                                                                                                                                                                                                                                                                                                                                                                                                                                                                                                                                                                                                                                                                                                                                                                                                                                                                                                                                                                                                                                                                                                                                                                                                                                                                                                                                                                                                                                                                                                                                                                                                                                                                                                                                                                                                                                                                                                                                                                                                                                                                                                                                                                                                                                                                                                                                                                                                                                                                                                                                                                                                                                                                                                                                                                                                                                                                                                                                                                                                                                                                                                                                                                                                                                                                                                                                                                                                                                                                                                                                                                                                                                                                                                                                                                                                                                                                                                                                                                                                                                                                                                                                                                                                                                                                                                                                                                                                                                                                                                                                                                                                                                                                                                                                                                                                                                                                                                                                                                                                                                                                                                                                                                                                                                                                                                                                                                                                                                                                                                                                                                                                                                                                                                                                                                                                                                                                                                                                                                                                                                                                                                                                                                                                                                                                                                    |
| 2                         | 2538336          | G             | TCCCTTGCG_TATTACGAG   | exonic  | EFR3B   | nonsynonymous SNV | EFR3B:ENST0000041432.3 exon15:c.G1312A;p.V43L;EFR3B:ENST00000264719.5 exon5:c.G94A>P;p.V317L;EFR3B:ENST00000405108.1 exon10:c.G868A;p.V290L;EFR3B:ENST00000402191.1 exon13:c.G1207A;p.V403L;EFR3B:ENST00000403714.2 exon13:c.G1312A;p.V4                                                                                                                                                                                                                                                                                                                                                                                                                                                                                                                                                                                                                                                                                                                                                                                                                                                                                                                                                                                                                                                                                                                                                                                                                                                                                                                                                                                                                                                                                                                                                                                                                                                                                                                                                                                                                                                                                                                                                                                                                                                                                                                                                                                                                                                                                                                                                                                                                                                                                                                                                                                                                                                                                                                                                                                                                                                                                                                                                                                                                                                                                                                                                                                                                                                                                                                                                                                                                                                                                                                                                                                                                                                                                                                                                                                                                                                                                                                                                                                                                                                                                                                                                                                                                                                                                                                                                                                                                                                                                                                                                                                                                                                                                                                                                                                                                                                                                                                                                                                                                                                                                                                                                                                                                                                                                                                                                                                                                                                                                                                                                                                                                                                                                                                                                                                                                                                                                                                                                                                                                                                                                                                                                                                                                                                                                                                                                                                                                                                                                                                                                                                                                                                                                                                                                                                                                                                                                                                                                                                                                                                                                                                                                                                                                                                                                                                                                                                                                                                                                                                                                                                                                                                                                                                                                                                                                                                                                                                                                                                                                                                                                                                                                                                                                                                                                                                                                                                                                                                                                                                                                                                                                                                                                                                                                                                                                                                                                                                                                                                                                                                                                                                                                                                                                                                                                                                                                                                                                                                                                                                                                                                                                                                                                                                                                                                                                                                                                                                                                                                                                                                                                                                                                                                                                                                                                                                                                                                                               |
| 2                         | 54120833         | A             | AAACGCTCG_GATTTAACAAT | exonic  | PSME4   | nonsynonymous SNV | PSME4:ENST0000041748.2 exon15:c.C1448T;p.V483L;PSME4:ENST00000404125.1 exon35:c.C4015T;p.P1339S,                                                                                                                                                                                                                                                                                                                                                                                                                                                                                                                                                                                                                                                                                                                                                                                                                                                                                                                                                                                                                                                                                                                                                                                                                                                                                                                                                                                                                                                                                                                                                                                                                                                                                                                                                                                                                                                                                                                                                                                                                                                                                                                                                                                                                                                                                                                                                                                                                                                                                                                                                                                                                                                                                                                                                                                                                                                                                                                                                                                                                                                                                                                                                                                                                                                                                                                                                                                                                                                                                                                                                                                                                                                                                                                                                                                                                                                                                                                                                                                                                                                                                                                                                                                                                                                                                                                                                                                                                                                                                                                                                                                                                                                                                                                                                                                                                                                                                                                                                                                                                                                                                                                                                                                                                                                                                                                                                                                                                                                                                                                                                                                                                                                                                                                                                                                                                                                                                                                                                                                                                                                                                                                                                                                                                                                                                                                                                                                                                                                                                                                                                                                                                                                                                                                                                                                                                                                                                                                                                                                                                                                                                                                                                                                                                                                                                                                                                                                                                                                                                                                                                                                                                                                                                                                                                                                                                                                                                                                                                                                                                                                                                                                                                                                                                                                                                                                                                                                                                                                                                                                                                                                                                                                                                                                                                                                                                                                                                                                                                                                                                                                                                                                                                                                                                                                                                                                                                                                                                                                                                                                                                                                                                                                                                                                                                                                                                                                                                                                                                                                                                                                                                                                                                                                                                                                                                                                                                                                                                                                                                                                                                       |
| 2                         | 54120834         | T             | AAACGCTCG_GATTTAACAAT | exonic  | PSME4   | nonsynonymous SNV | PSME4:ENST0000041748.2 exon15:c.C1447T;p.P483S;PSME4:ENST00000404125.1 exon35:c.C4015T;p.P1339S,                                                                                                                                                                                                                                                                                                                                                                                                                                                                                                                                                                                                                                                                                                                                                                                                                                                                                                                                                                                                                                                                                                                                                                                                                                                                                                                                                                                                                                                                                                                                                                                                                                                                                                                                                                                                                                                                                                                                                                                                                                                                                                                                                                                                                                                                                                                                                                                                                                                                                                                                                                                                                                                                                                                                                                                                                                                                                                                                                                                                                                                                                                                                                                                                                                                                                                                                                                                                                                                                                                                                                                                                                                                                                                                                                                                                                                                                                                                                                                                                                                                                                                                                                                                                                                                                                                                                                                                                                                                                                                                                                                                                                                                                                                                                                                                                                                                                                                                                                                                                                                                                                                                                                                                                                                                                                                                                                                                                                                                                                                                                                                                                                                                                                                                                                                                                                                                                                                                                                                                                                                                                                                                                                                                                                                                                                                                                                                                                                                                                                                                                                                                                                                                                                                                                                                                                                                                                                                                                                                                                                                                                                                                                                                                                                                                                                                                                                                                                                                                                                                                                                                                                                                                                                                                                                                                                                                                                                                                                                                                                                                                                                                                                                                                                                                                                                                                                                                                                                                                                                                                                                                                                                                                                                                                                                                                                                                                                                                                                                                                                                                                                                                                                                                                                                                                                                                                                                                                                                                                                                                                                                                                                                                                                                                                                                                                                                                                                                                                                                                                                                                                                                                                                                                                                                                                                                                                                                                                                                                                                                                                                                       |
| 2                         | 19730279         | T             | TGTCCTTCT_GAGATCGCT   | exonic  | ANKRD36 | stopgain          | ANKRD36:ENST0000041531.2 exon2:c.C67A>T;p.M914K;ANKRD36:ENST00000420699.2 exon2:c.C67A>T;p.R22XK,                                                                                                                                                                                                                                                                                                                                                                                                                                                                                                                                                                                                                                                                                                                                                                                                                                                                                                                                                                                                                                                                                                                                                                                                                                                                                                                                                                                                                                                                                                                                                                                                                                                                                                                                                                                                                                                                                                                                                                                                                                                                                                                                                                                                                                                                                                                                                                                                                                                                                                                                                                                                                                                                                                                                                                                                                                                                                                                                                                                                                                                                                                                                                                                                                                                                                                                                                                                                                                                                                                                                                                                                                                                                                                                                                                                                                                                                                                                                                                                                                                                                                                                                                                                                                                                                                                                                                                                                                                                                                                                                                                                                                                                                                                                                                                                                                                                                                                                                                                                                                                                                                                                                                                                                                                                                                                                                                                                                                                                                                                                                                                                                                                                                                                                                                                                                                                                                                                                                                                                                                                                                                                                                                                                                                                                                                                                                                                                                                                                                                                                                                                                                                                                                                                                                                                                                                                                                                                                                                                                                                                                                                                                                                                                                                                                                                                                                                                                                                                                                                                                                                                                                                                                                                                                                                                                                                                                                                                                                                                                                                                                                                                                                                                                                                                                                                                                                                                                                                                                                                                                                                                                                                                                                                                                                                                                                                                                                                                                                                                                                                                                                                                                                                                                                                                                                                                                                                                                                                                                                                                                                                                                                                                                                                                                                                                                                                                                                                                                                                                                                                                                                                                                                                                                                                                                                                                                                                                                                                                                                                                                                                      |
| 2                         | 98887171         | A             | CCAATACAGT_CCTTGAGAAC | exonic  | VWA3B   | nonsynonymous SNV | VWA3B:ENST00000477737.1 exon22:c.A276G>C;p.Y957F,                                                                                                                                                                                                                                                                                                                                                                                                                                                                                                                                                                                                                                                                                                                                                                                                                                                                                                                                                                                                                                                                                                                                                                                                                                                                                                                                                                                                                                                                                                                                                                                                                                                                                                                                                                                                                                                                                                                                                                                                                                                                                                                                                                                                                                                                                                                                                                                                                                                                                                                                                                                                                                                                                                                                                                                                                                                                                                                                                                                                                                                                                                                                                                                                                                                                                                                                                                                                                                                                                                                                                                                                                                                                                                                                                                                                                                                                                                                                                                                                                                                                                                                                                                                                                                                                                                                                                                                                                                                                                                                                                                                                                                                                                                                                                                                                                                                                                                                                                                                                                                                                                                                                                                                                                                                                                                                                                                                                                                                                                                                                                                                                                                                                                                                                                                                                                                                                                                                                                                                                                                                                                                                                                                                                                                                                                                                                                                                                                                                                                                                                                                                                                                                                                                                                                                                                                                                                                                                                                                                                                                                                                                                                                                                                                                                                                                                                                                                                                                                                                                                                                                                                                                                                                                                                                                                                                                                                                                                                                                                                                                                                                                                                                                                                                                                                                                                                                                                                                                                                                                                                                                                                                                                                                                                                                                                                                                                                                                                                                                                                                                                                                                                                                                                                                                                                                                                                                                                                                                                                                                                                                                                                                                                                                                                                                                                                                                                                                                                                                                                                                                                                                                                                                                                                                                                                                                                                                                                                                                                                                                                                                                                                      |
| 2                         | 11659832         | T             | GCAGCAAGA_TCAATTCCAA  | exonic  | DPP10   | nonsynonymous SNV | DPP10:ENST00000409163.1 exon26:c.T2039G;p.V808G;DPP10:ENST00000410059.1 exon5:c.T2189G;p.V730G;DPP10:ENST000004093147.2 exon25:c.T2201G;p.V734G,                                                                                                                                                                                                                                                                                                                                                                                                                                                                                                                                                                                                                                                                                                                                                                                                                                                                                                                                                                                                                                                                                                                                                                                                                                                                                                                                                                                                                                                                                                                                                                                                                                                                                                                                                                                                                                                                                                                                                                                                                                                                                                                                                                                                                                                                                                                                                                                                                                                                                                                                                                                                                                                                                                                                                                                                                                                                                                                                                                                                                                                                                                                                                                                                                                                                                                                                                                                                                                                                                                                                                                                                                                                                                                                                                                                                                                                                                                                                                                                                                                                                                                                                                                                                                                                                                                                                                                                                                                                                                                                                                                                                                                                                                                                                                                                                                                                                                                                                                                                                                                                                                                                                                                                                                                                                                                                                                                                                                                                                                                                                                                                                                                                                                                                                                                                                                                                                                                                                                                                                                                                                                                                                                                                                                                                                                                                                                                                                                                                                                                                                                                                                                                                                                                                                                                                                                                                                                                                                                                                                                                                                                                                                                                                                                                                                                                                                                                                                                                                                                                                                                                                                                                                                                                                                                                                                                                                                                                                                                                                                                                                                                                                                                                                                                                                                                                                                                                                                                                                                                                                                                                                                                                                                                                                                                                                                                                                                                                                                                                                                                                                                                                                                                                                                                                                                                                                                                                                                                                                                                                                                                                                                                                                                                                                                                                                                                                                                                                                                                                                                                                                                                                                                                                                                                                                                                                                                                                                                                                                                                                       |
| 2                         | 13491363         | G             | GATCGTGAAT_AAACATGGGG | exonic  | NCKAP5  | nonsynonymous SNV | NCKAP5:ENST00000405974.3 exon11:c.C1408G;p.H470D;NCKAP5:ENST00000402131.1 exon25:c.C1408G;p.H470D;NCKAP5:ENST00000371721.6 exon15:c.C5365G;p.H1789D;NCKAP5:ENST00000409261.1 exon17:c.C5365G;p.H1789D,                                                                                                                                                                                                                                                                                                                                                                                                                                                                                                                                                                                                                                                                                                                                                                                                                                                                                                                                                                                                                                                                                                                                                                                                                                                                                                                                                                                                                                                                                                                                                                                                                                                                                                                                                                                                                                                                                                                                                                                                                                                                                                                                                                                                                                                                                                                                                                                                                                                                                                                                                                                                                                                                                                                                                                                                                                                                                                                                                                                                                                                                                                                                                                                                                                                                                                                                                                                                                                                                                                                                                                                                                                                                                                                                                                                                                                                                                                                                                                                                                                                                                                                                                                                                                                                                                                                                                                                                                                                                                                                                                                                                                                                                                                                                                                                                                                                                                                                                                                                                                                                                                                                                                                                                                                                                                                                                                                                                                                                                                                                                                                                                                                                                                                                                                                                                                                                                                                                                                                                                                                                                                                                                                                                                                                                                                                                                                                                                                                                                                                                                                                                                                                                                                                                                                                                                                                                                                                                                                                                                                                                                                                                                                                                                                                                                                                                                                                                                                                                                                                                                                                                                                                                                                                                                                                                                                                                                                                                                                                                                                                                                                                                                                                                                                                                                                                                                                                                                                                                                                                                                                                                                                                                                                                                                                                                                                                                                                                                                                                                                                                                                                                                                                                                                                                                                                                                                                                                                                                                                                                                                                                                                                                                                                                                                                                                                                                                                                                                                                                                                                                                                                                                                                                                                                                                                                                                                                                                                                                                 |
| 2                         | 16000969         | T             | CGATGAGCC_CGCTCAACCT  | exonic  | TANC1   | nonsynonymous SNV | TANC1:ENST0000026363.6 exon7:c.T574G>C;p.I925Q,                                                                                                                                                                                                                                                                                                                                                                                                                                                                                                                                                                                                                                                                                                                                                                                                                                                                                                                                                                                                                                                                                                                                                                                                                                                                                                                                                                                                                                                                                                                                                                                                                                                                                                                                                                                                                                                                                                                                                                                                                                                                                                                                                                                                                                                                                                                                                                                                                                                                                                                                                                                                                                                                                                                                                                                                                                                                                                                                                                                                                                                                                                                                                                                                                                                                                                                                                                                                                                                                                                                                                                                                                                                                                                                                                                                                                                                                                                                                                                                                                                                                                                                                                                                                                                                                                                                                                                                                                                                                                                                                                                                                                                                                                                                                                                                                                                                                                                                                                                                                                                                                                                                                                                                                                                                                                                                                                                                                                                                                                                                                                                                                                                                                                                                                                                                                                                                                                                                                                                                                                                                                                                                                                                                                                                                                                                                                                                                                                                                                                                                                                                                                                                                                                                                                                                                                                                                                                                                                                                                                                                                                                                                                                                                                                                                                                                                                                                                                                                                                                                                                                                                                                                                                                                                                                                                                                                                                                                                                                                                                                                                                                                                                                                                                                                                                                                                                                                                                                                                                                                                                                                                                                                                                                                                                                                                                                                                                                                                                                                                                                                                                                                                                                                                                                                                                                                                                                                                                                                                                                                                                                                                                                                                                                                                                                                                                                                                                                                                                                                                                                                                                                                                                                                                                                                                                                                                                                                                                                                                                                                                                                                                                        |
| 2                         | 16373863         | T             | ACGTCTGGT_GGAGCTTAAAC | exonic  | ITC21B  | nonsynonymous SNV | ITC21B:ENST00000203344.2 exon8:c.T799A;p.S267F,                                                                                                                                                                                                                                                                                                                                                                                                                                                                                                                                                                                                                                                                                                                                                                                                                                                                                                                                                                                                                                                                                                                                                                                                                                                                                                                                                                                                                                                                                                                                                                                                                                                                                                                                                                                                                                                                                                                                                                                                                                                                                                                                                                                                                                                                                                                                                                                                                                                                                                                                                                                                                                                                                                                                                                                                                                                                                                                                                                                                                                                                                                                                                                                                                                                                                                                                                                                                                                                                                                                                                                                                                                                                                                                                                                                                                                                                                                                                                                                                                                                                                                                                                                                                                                                                                                                                                                                                                                                                                                                                                                                                                                                                                                                                                                                                                                                                                                                                                                                                                                                                                                                                                                                                                                                                                                                                                                                                                                                                                                                                                                                                                                                                                                                                                                                                                                                                                                                                                                                                                                                                                                                                                                                                                                                                                                                                                                                                                                                                                                                                                                                                                                                                                                                                                                                                                                                                                                                                                                                                                                                                                                                                                                                                                                                                                                                                                                                                                                                                                                                                                                                                                                                                                                                                                                                                                                                                                                                                                                                                                                                                                                                                                                                                                                                                                                                                                                                                                                                                                                                                                                                                                                                                                                                                                                                                                                                                                                                                                                                                                                                                                                                                                                                                                                                                                                                                                                                                                                                                                                                                                                                                                                                                                                                                                                                                                                                                                                                                                                                                                                                                                                                                                                                                                                                                                                                                                                                                                                                                                                                                                                                                        |
| 2                         | 167133576        | G             | TCCACATCGT_CCTCATCCAC | exonic  | SCN8A   | nonsynonymous SNV | SCN8A:ENST0000037587.4 exon16:c.AE2794C;p.T832P;SCN8A:ENST00000409435.1 exon15:c.AE2794C;p.T832P;SCN8A:ENST00000303354.6 exon16:c.AE2794C;p.T832P;SCN8A:ENST0000040672.1 exon16:c.AE2794C;p.T832P,                                                                                                                                                                                                                                                                                                                                                                                                                                                                                                                                                                                                                                                                                                                                                                                                                                                                                                                                                                                                                                                                                                                                                                                                                                                                                                                                                                                                                                                                                                                                                                                                                                                                                                                                                                                                                                                                                                                                                                                                                                                                                                                                                                                                                                                                                                                                                                                                                                                                                                                                                                                                                                                                                                                                                                                                                                                                                                                                                                                                                                                                                                                                                                                                                                                                                                                                                                                                                                                                                                                                                                                                                                                                                                                                                                                                                                                                                                                                                                                                                                                                                                                                                                                                                                                                                                                                                                                                                                                                                                                                                                                                                                                                                                                                                                                                                                                                                                                                                                                                                                                                                                                                                                                                                                                                                                                                                                                                                                                                                                                                                                                                                                                                                                                                                                                                                                                                                                                                                                                                                                                                                                                                                                                                                                                                                                                                                                                                                                                                                                                                                                                                                                                                                                                                                                                                                                                                                                                                                                                                                                                                                                                                                                                                                                                                                                                                                                                                                                                                                                                                                                                                                                                                                                                                                                                                                                                                                                                                                                                                                                                                                                                                                                                                                                                                                                                                                                                                                                                                                                                                                                                                                                                                                                                                                                                                                                                                                                                                                                                                                                                                                                                                                                                                                                                                                                                                                                                                                                                                                                                                                                                                                                                                                                                                                                                                                                                                                                                                                                                                                                                                                                                                                                                                                                                                                                                                                                                                                                                     |
| 2                         | 17124362         | C             | CTATGACCTG_CATCATCATC | exonic  | MYO3B   | nonsynonymous SNV | MYO3B:ENST00000409044.3 exon14:c.C1451T;p.A484V;MYO3B:ENST00000408978.4 exon14:c.C1451T;p.A484V;MYO3B:ENST00000317935.3 exon14:c.C1451T;p.A484V;MYO3B:ENST00000334231.3 exon14:c.C1478T;p.A493V;MYO3B:ENST00000484338.2 exon14:c.C14                                                                                                                                                                                                                                                                                                                                                                                                                                                                                                                                                                                                                                                                                                                                                                                                                                                                                                                                                                                                                                                                                                                                                                                                                                                                                                                                                                                                                                                                                                                                                                                                                                                                                                                                                                                                                                                                                                                                                                                                                                                                                                                                                                                                                                                                                                                                                                                                                                                                                                                                                                                                                                                                                                                                                                                                                                                                                                                                                                                                                                                                                                                                                                                                                                                                                                                                                                                                                                                                                                                                                                                                                                                                                                                                                                                                                                                                                                                                                                                                                                                                                                                                                                                                                                                                                                                                                                                                                                                                                                                                                                                                                                                                                                                                                                                                                                                                                                                                                                                                                                                                                                                                                                                                                                                                                                                                                                                                                                                                                                                                                                                                                                                                                                                                                                                                                                                                                                                                                                                                                                                                                                                                                                                                                                                                                                                                                                                                                                                                                                                                                                                                                                                                                                                                                                                                                                                                                                                                                                                                                                                                                                                                                                                                                                                                                                                                                                                                                                                                                                                                                                                                                                                                                                                                                                                                                                                                                                                                                                                                                                                                                                                                                                                                                                                                                                                                                                                                                                                                                                                                                                                                                                                                                                                                                                                                                                                                                                                                                                                                                                                                                                                                                                                                                                                                                                                                                                                                                                                                                                                                                                                                                                                                                                                                                                                                                                                                                                                                                                                                                                                                                                                                                                                                                                                                                                                                                                                                                   |
| 2                         | 17834352         | G             | GTGATTTAA_GATTTGACCC  | exonic  | AGPS    | nonsynonymous SNV | AGPS:ENST00000284167.4 exon4:c.G1369A;p.G457R,                                                                                                                                                                                                                                                                                                                                                                                                                                                                                                                                                                                                                                                                                                                                                                                                                                                                                                                                                                                                                                                                                                                                                                                                                                                                                                                                                                                                                                                                                                                                                                                                                                                                                                                                                                                                                                                                                                                                                                                                                                                                                                                                                                                                                                                                                                                                                                                                                                                                                                                                                                                                                                                                                                                                                                                                                                                                                                                                                                                                                                                                                                                                                                                                                                                                                                                                                                                                                                                                                                                                                                                                                                                                                                                                                                                                                                                                                                                                                                                                                                                                                                                                                                                                                                                                                                                                                                                                                                                                                                                                                                                                                                                                                                                                                                                                                                                                                                                                                                                                                                                                                                                                                                                                                                                                                                                                                                                                                                                                                                                                                                                                                                                                                                                                                                                                                                                                                                                                                                                                                                                                                                                                                                                                                                                                                                                                                                                                                                                                                                                                                                                                                                                                                                                                                                                                                                                                                                                                                                                                                                                                                                                                                                                                                                                                                                                                                                                                                                                                                                                                                                                                                                                                                                                                                                                                                                                                                                                                                                                                                                                                                                                                                                                                                                                                                                                                                                                                                                                                                                                                                                                                                                                                                                                                                                                                                                                                                                                                                                                                                                                                                                                                                                                                                                                                                                                                                                                                                                                                                                                                                                                                                                                                                                                                                                                                                                                                                                                                                                                                                                                                                                                                                                                                                                                                                                                                                                                                                                                                                                                                                                                                         |
| 2                         | 17854353         | G             | TAGTTTTAA_GATTACCCCA  | exonic  | AGPS    | nonsynonymous SNV | AGPS:ENST00000284167.4 exon4:c.G1370A;p.G457E,                                                                                                                                                                                                                                                                                                                                                                                                                                                                                                                                                                                                                                                                                                                                                                                                                                                                                                                                                                                                                                                                                                                                                                                                                                                                                                                                                                                                                                                                                                                                                                                                                                                                                                                                                                                                                                                                                                                                                                                                                                                                                                                                                                                                                                                                                                                                                                                                                                                                                                                                                                                                                                                                                                                                                                                                                                                                                                                                                                                                                                                                                                                                                                                                                                                                                                                                                                                                                                                                                                                                                                                                                                                                                                                                                                                                                                                                                                                                                                                                                                                                                                                                                                                                                                                                                                                                                                                                                                                                                                                                                                                                                                                                                                                                                                                                                                                                                                                                                                                                                                                                                                                                                                                                                                                                                                                                                                                                                                                                                                                                                                                                                                                                                                                                                                                                                                                                                                                                                                                                                                                                                                                                                                                                                                                                                                                                                                                                                                                                                                                                                                                                                                                                                                                                                                                                                                                                                                                                                                                                                                                                                                                                                                                                                                                                                                                                                                                                                                                                                                                                                                                                                                                                                                                                                                                                                                                                                                                                                                                                                                                                                                                                                                                                                                                                                                                                                                                                                                                                                                                                                                                                                                                                                                                                                                                                                                                                                                                                                                                                                                                                                                                                                                                                                                                                                                                                                                                                                                                                                                                                                                                                                                                                                                                                                                                                                                                                                                                                                                                                                                                                                                                                                                                                                                                                                                                                                                                                                                                                                                                                                                                                         |
| 2                         | 22863332         | A             | TGTCTAGCT_GAGCCGCGCG  | exonic  | FZD5    | nonsynonymous SNV | FZD5:ENST00000295417.3 exon2:c.C1320G>T;p.H44M,                                                                                                                                                                                                                                                                                                                                                                                                                                                                                                                                                                                                                                                                                                                                                                                                                                                                                                                                                                                                                                                                                                                                                                                                                                                                                                                                                                                                                                                                                                                                                                                                                                                                                                                                                                                                                                                                                                                                                                                                                                                                                                                                                                                                                                                                                                                                                                                                                                                                                                                                                                                                                                                                                                                                                                                                                                                                                                                                                                                                                                                                                                                                                                                                                                                                                                                                                                                                                                                                                                                                                                                                                                                                                                                                                                                                                                                                                                                                                                                                                                                                                                                                                                                                                                                                                                                                                                                                                                                                                                                                                                                                                                                                                                                                                                                                                                                                                                                                                                                                                                                                                                                                                                                                                                                                                                                                                                                                                                                                                                                                                                                                                                                                                                                                                                                                                                                                                                                                                                                                                                                                                                                                                                                                                                                                                                                                                                                                                                                                                                                                                                                                                                                                                                                                                                                                                                                                                                                                                                                                                                                                                                                                                                                                                                                                                                                                                                                                                                                                                                                                                                                                                                                                                                                                                                                                                                                                                                                                                                                                                                                                                                                                                                                                                                                                                                                                                                                                                                                                                                                                                                                                                                                                                                                                                                                                                                                                                                                                                                                                                                                                                                                                                                                                                                                                                                                                                                                                                                                                                                                                                                                                                                                                                                                                                                                                                                                                                                                                                                                                                                                                                                                                                                                                                                                                                                                                                                                                                                                                                                                                                                                                        |
| 2                         | 21059938         | C             | ATGAGCCCTG_ATTTAATCTT | exonic  | MAP2    | nonsynonymous SNV | MAP2:ENST00000360351.4 exon11:c.G2144A;p.G171E;MAP2:ENST00000447185.1 exon4:c.G2132A;p.G711E,                                                                                                                                                                                                                                                                                                                                                                                                                                                                                                                                                                                                                                                                                                                                                                                                                                                                                                                                                                                                                                                                                                                                                                                                                                                                                                                                                                                                                                                                                                                                                                                                                                                                                                                                                                                                                                                                                                                                                                                                                                                                                                                                                                                                                                                                                                                                                                                                                                                                                                                                                                                                                                                                                                                                                                                                                                                                                                                                                                                                                                                                                                                                                                                                                                                                                                                                                                                                                                                                                                                                                                                                                                                                                                                                                                                                                                                                                                                                                                                                                                                                                                                                                                                                                                                                                                                                                                                                                                                                                                                                                                                                                                                                                                                                                                                                                                                                                                                                                                                                                                                                                                                                                                                                                                                                                                                                                                                                                                                                                                                                                                                                                                                                                                                                                                                                                                                                                                                                                                                                                                                                                                                                                                                                                                                                                                                                                                                                                                                                                                                                                                                                                                                                                                                                                                                                                                                                                                                                                                                                                                                                                                                                                                                                                                                                                                                                                                                                                                                                                                                                                                                                                                                                                                                                                                                                                                                                                                                                                                                                                                                                                                                                                                                                                                                                                                                                                                                                                                                                                                                                                                                                                                                                                                                                                                                                                                                                                                                                                                                                                                                                                                                                                                                                                                                                                                                                                                                                                                                                                                                                                                                                                                                                                                                                                                                                                                                                                                                                                                                                                                                                                                                                                                                                                                                                                                                                                                                                                                                                                                                                                          |
| 2                         | 21058106         | T             | ATTACAAGA_GAGACACCCA  | exonic  | MAP2    | nonsynonymous SNV | MAP2:ENST00000360351.4 exon11:c.G2142A;p.D1374E;MAP2:ENST00000447185.1 exon4:c.T4110A;p.D1370E,                                                                                                                                                                                                                                                                                                                                                                                                                                                                                                                                                                                                                                                                                                                                                                                                                                                                                                                                                                                                                                                                                                                                                                                                                                                                                                                                                                                                                                                                                                                                                                                                                                                                                                                                                                                                                                                                                                                                                                                                                                                                                                                                                                                                                                                                                                                                                                                                                                                                                                                                                                                                                                                                                                                                                                                                                                                                                                                                                                                                                                                                                                                                                                                                                                                                                                                                                                                                                                                                                                                                                                                                                                                                                                                                                                                                                                                                                                                                                                                                                                                                                                                                                                                                                                                                                                                                                                                                                                                                                                                                                                                                                                                                                                                                                                                                                                                                                                                                                                                                                                                                                                                                                                                                                                                                                                                                                                                                                                                                                                                                                                                                                                                                                                                                                                                                                                                                                                                                                                                                                                                                                                                                                                                                                                                                                                                                                                                                                                                                                                                                                                                                                                                                                                                                                                                                                                                                                                                                                                                                                                                                                                                                                                                                                                                                                                                                                                                                                                                                                                                                                                                                                                                                                                                                                                                                                                                                                                                                                                                                                                                                                                                                                                                                                                                                                                                                                                                                                                                                                                                                                                                                                                                                                                                                                                                                                                                                                                                                                                                                                                                                                                                                                                                                                                                                                                                                                                                                                                                                                                                                                                                                                                                                                                                                                                                                                                                                                                                                                                                                                                                                                                                                                                                                                                                                                                                                                                                                                                                                                                                                                        |
| 2                         | 21897781         | A             | TACCATGAGT_ACTCCATCC  | exonic  | XRCO5   | nonsynonymous SNV | XRCO5:ENST00000417391.1 exon3:c.A25T>N;XRCO5:ENST00000392133.1 exon3:c.A64T>N;XRCO5:ENST00000392132.1 exon2:c.A64T>N;XRCO5:ENST00000392131.1 exon2:c.A64T>N;XRCO5:ENST00000392130.1 exon2:c.A64T>N;XRCO5:ENST00000392129.1 exon2:c.A64T>N;XRCO5:ENST00000392128.1 exon2:c.A64T>N;XRCO5:ENST00000392127.1 exon2:c.A64T>N;XRCO5:ENST00000392126.1 exon2:c.A64T>N;XRCO5:ENST00000392125.1 exon2:c.A64T>N;XRCO5:ENST00000392124.1 exon2:c.A64T>N;XRCO5:ENST00000392123.1 exon2:c.A64T>N;XRCO5:ENST00000392122.1 exon2:c.A64T>N;XRCO5:ENST00000392121.1 exon2:c.A64T>N;XRCO5:ENST00000392120.1 exon2:c.A64T>N;XRCO5:ENST00000392119.1 exon2:c.A64T>N;XRCO5:ENST00000392118.1 exon2:c.A64T>N;XRCO5:ENST00000392117.1 exon2:c.A64T>N;XRCO5:ENST00000392116.1 exon2:c.A64T>N;XRCO5:ENST00000392115.1 exon2:c.A64T>N;XRCO5:ENST00000392114.1 exon2:c.A64T>N;XRCO5:ENST00000392113.1 exon2:c.A64T>N;XRCO5:ENST00000392112.1 exon2:c.A64T>N;XRCO5:ENST00000392111.1 exon2:c.A64T>N;XRCO5:ENST00000392110.1 exon2:c.A64T>N;XRCO5:ENST00000392109.1 exon2:c.A64T>N;XRCO5:ENST00000392108.1 exon2:c.A64T>N;XRCO5:ENST00000392107.1 exon2:c.A64T>N;XRCO5:ENST00000392106.1 exon2:c.A64T>N;XRCO5:ENST00000392105.1 exon2:c.A64T>N;XRCO5:ENST00000392104.1 exon2:c.A64T>N;XRCO5:ENST00000392103.1 exon2:c.A64T>N;XRCO5:ENST00000392102.1 exon2:c.A64T>N;XRCO5:ENST00000392101.1 exon2:c.A64T>N;XRCO5:ENST00000392100.1 exon2:c.A64T>N;XRCO5:ENST00000392099.1 exon2:c.A64T>N;XRCO5:ENST00000392098.1 exon2:c.A64T>N;XRCO5:ENST00000392097.1 exon2:c.A64T>N;XRCO5:ENST00000392096.1 exon2:c.A64T>N;XRCO5:ENST00000392095.1 exon2:c.A64T>N;XRCO5:ENST00000392094.1 exon2:c.A64T>N;XRCO5:ENST00000392093.1 exon2:c.A64T>N;XRCO5:ENST00000392092.1 exon2:c.A64T>N;XRCO5:ENST00000392091.1 exon2:c.A64T>N;XRCO5:ENST00000392090.1 exon2:c.A64T>N;XRCO5:ENST00000392089.1 exon2:c.A64T>N;XRCO5:ENST00000392088.1 exon2:c.A64T>N;XRCO5:ENST00000392087.1 exon2:c.A64T>N;XRCO5:ENST00000392086.1 exon2:c.A64T>N;XRCO5:ENST00000392085.1 exon2:c.A64T>N;XRCO5:ENST00000392084.1 exon2:c.A64T>N;XRCO5:ENST00000392083.1 exon2:c.A64T>N;XRCO5:ENST00000392082.1 exon2:c.A64T>N;XRCO5:ENST00000392081.1 exon2:c.A64T>N;XRCO5:ENST00000392080.1 exon2:c.A64T>N;XRCO5:ENST00000392079.1 exon2:c.A64T>N;XRCO5:ENST00000392078.1 exon2:c.A64T>N;XRCO5:ENST00000392077.1 exon2:c.A64T>N;XRCO5:ENST00000392076.1 exon2:c.A64T>N;XRCO5:ENST00000392075.1 exon2:c.A64T>N;XRCO5:ENST00000392074.1 exon2:c.A64T>N;XRCO5:ENST00000392073.1 exon2:c.A64T>N;XRCO5:ENST00000392072.1 exon2:c.A64T>N;XRCO5:ENST00000392071.1 exon2:c.A64T>N;XRCO5:ENST00000392070.1 exon2:c.A64T>N;XRCO5:ENST00000392069.1 exon2:c.A64T>N;XRCO5:ENST00000392068.1 exon2:c.A64T>N;XRCO5:ENST00000392067.1 exon2:c.A64T>N;XRCO5:ENST00000392066.1 exon2:c.A64T>N;XRCO5:ENST00000392065.1 exon2:c.A64T>N;XRCO5:ENST00000392064.1 exon2:c.A64T>N;XRCO5:ENST00000392063.1 exon2:c.A64T>N;XRCO5:ENST00000392062.1 exon2:c.A64T>N;XRCO5:ENST00000392061.1 exon2:c.A64T>N;XRCO5:ENST00000392060.1 exon2:c.A64T>N;XRCO5:ENST00000392059.1 exon2:c.A64T>N;XRCO5:ENST00000392058.1 exon2:c.A64T>N;XRCO5:ENST00000392057.1 exon2:c.A64T>N;XRCO5:ENST00000392056.1 exon2:c.A64T>N;XRCO5:ENST00000392055.1 exon2:c.A64T>N;XRCO5:ENST00000392054.1 exon2:c.A64T>N;XRCO5:ENST00000392053.1 exon2:c.A64T>N;XRCO5:ENST00000392052.1 exon2:c.A64T>N;XRCO5:ENST00000392051.1 exon2:c.A64T>N;XRCO5:ENST00000392050.1 exon2:c.A64T>N;XRCO5:ENST00000392049.1 exon2:c.A64T>N;XRCO5:ENST00000392048.1 exon2:c.A64T>N;XRCO5:ENST00000392047.1 exon2:c.A64T>N;XRCO5:ENST00000392046.1 exon2:c.A64T>N;XRCO5:ENST00000392045.1 exon2:c.A64T>N;XRCO5:ENST00000392044.1 exon2:c.A64T>N;XRCO5:ENST00000392043.1 exon2:c.A64T>N;XRCO5:ENST00000392042.1 exon2:c.A64T>N;XRCO5:ENST00000392041.1 exon2:c.A64T>N;XRCO5:ENST00000392040.1 exon2:c.A64T>N;XRCO5:ENST00000392039.1 exon2:c.A64T>N;XRCO5:ENST00000392038.1 exon2:c.A64T>N;XRCO5:ENST00000392037.1 exon2:c.A64T>N;XRCO5:ENST00000392036.1 exon2:c.A64T>N;XRCO5:ENST00000392035.1 exon2:c.A64T>N;XRCO5:ENST00000392034.1 exon2:c.A64T>N;XRCO5:ENST00000392033.1 exon2:c.A64T>N;XRCO5:ENST00000392032.1 exon2:c.A64T>N;XRCO5:ENST00000392031.1 exon2:c.A64T>N;XRCO5:ENST00000392030.1 exon2:c.A64T>N;XRCO5:ENST00000392029.1 exon2:c.A64T>N;XRCO5:ENST00000392028.1 exon2:c.A64T>N;XRCO5:ENST00000392027.1 exon2:c.A64T>N;XRCO5:ENST00000392026.1 exon2:c.A64T>N;XRCO5:ENST00000392025.1 exon2:c.A64T>N;XRCO5:ENST00000392024.1 exon2:c.A64T>N;XRCO5:ENST00000392023.1 exon2:c.A64T>N;XRCO5:ENST00000392022.1 exon2:c.A64T>N;XRCO5:ENST00000392021.1 exon2:c.A64T>N;XRCO5:ENST00000392020.1 exon2:c.A64T>N;XRCO5:ENST00000392019.1 exon2:c.A64T>N;XRCO5:ENST00000392018.1 exon2:c.A64T>N;XRCO5:ENST00000392017.1 exon2:c.A64T>N;XRCO5:ENST00000392016.1 exon2:c.A64T>N;XRCO5:ENST00000392015.1 exon2:c.A64T>N;XRCO5:ENST00000392014.1 exon2:c.A64T>N;XRCO5:ENST00000392013.1 exon2:c.A64T>N;XRCO5:ENST00000392012.1 exon2:c.A64T>N;XRCO5:ENST00000392011.1 exon2:c.A64T>N;XRCO5:ENST00000392010.1 exon2:c.A64T>N;XRCO5:ENST00000392009.1 exon2:c.A64T>N;XRCO5:ENST00000392008.1 exon2:c.A64T>N;XRCO5:ENST00000392007.1 exon2:c.A64T>N;XRCO5:ENST00000392006.1 exon2:c.A64T>N;XRCO5:ENST00000392005.1 exon2:c.A64T>N;XRCO5:ENST00000392004.1 exon2:c.A64T>N;XRCO5:ENST00000392003.1 exon2:c.A64T>N;XRCO5:ENST00000392002.1 exon2:c.A64T>N;XRCO5:ENST00000392001.1 exon2:c.A64T>N;XRCO5:ENST00000392000.1 exon2:c.A64T>N;XRCO5:ENST00000391999.1 exon2:c.A64T>N;XRCO5:ENST00000391998.1 exon2:c.A64T>N;XRCO5:ENST00000391997.1 exon2:c.A64T>N;XRCO5:ENST00000391996.1 exon2:c.A64T>N;XRCO5:ENST00000391995.1 exon2:c.A64T>N;XRCO5:ENST00000391994.1 exon2:c.A64T>N;XRCO5:ENST00000391993.1 exon2:c.A64T>N;XRCO5:ENST00000391992.1 exon2:c.A64T>N;XRCO5:ENST00000391991.1 exon2:c.A64T>N;XRCO5:ENST00000391990.1 exon2:c.A64T>N;XRCO5:ENST00000391989.1 exon2:c.A64T>N;XRCO5:ENST00000391988.1 exon2:c.A64T>N;XRCO5:ENST00000391987.1 exon2:c.A64T>N;XRCO5:ENST00000391986.1 exon2:c.A64T>N;XRCO5:ENST00000391985.1 exon2:c.A64T>N;XRCO5:ENST00000391984.1 exon2:c.A64T>N;XRCO5:ENST00000391983.1 exon2:c.A64T>N;XRCO5:ENST00000391982.1 exon2:c.A64T>N;XRCO5:ENST00000391981.1 exon2:c.A64T>N;XRCO5:ENST00000391980.1 exon2:c.A64T>N;XRCO5:ENST00000391979.1 exon2:c.A64T>N;XRCO5:ENST00000391978.1 exon2:c.A64T>N;XRCO5:ENST00000391977.1 exon2:c.A64T>N;XRCO5:ENST00000391976.1 exon2:c.A64T>N;XRCO5:ENST00000391975.1 exon2:c.A64T>N;XRCO5:ENST00000391974.1 exon2:c.A64T>N;XRCO5:ENST00000391973.1 exon2:c.A64T>N;XRCO5:ENST00000391972.1 exon2:c.A64T>N;XRCO5:ENST00000391971.1 exon2:c.A64T>N;XRCO5:ENST00000391970.1 exon2:c.A64T>N;XRCO5:ENST00000391969.1 exon2:c.A64T>N;XRCO5:ENST00000391968.1 exon2:c.A64T>N;XRCO5:ENST00000391967.1 exon2:c.A64T>N;XRCO5:ENST00000391966.1 exon2:c.A64T>N;XRCO5:ENST00000391965.1 exon2:c.A64T>N;XRCO5:ENST00000391964.1 exon2:c.A64T>N;XRCO5:ENST00000391963.1 exon2:c.A64T>N;XRCO5:ENST00000391962.1 exon2:c.A64T>N;XRCO5:ENST00000391961.1 exon2:c.A64T>N;XRCO5:ENST00000391960.1 exon2:c.A64T>N;XRCO5:ENST00000391959.1 exon2:c.A64T>N;XRCO5:ENST00000391958.1 exon2:c.A64T>N;XRCO5:ENST00000391957.1 exon2:c.A64T>N;XRCO5:ENST00000391956.1 exon2:c.A64T>N;XRCO5:ENST00000391955.1 exon2:c.A64T>N;XRCO5:ENST00000391954.1 exon2:c.A64T>N;XRCO5:ENST00000391953.1 exon2:c.A64T>N;XRCO5:ENST00000391952.1 exon2:c.A64T>N;XRCO5:ENST00000391951.1 exon2:c.A64T>N;XRCO5:ENST00000391950.1 exon2:c.A64T>N;XRCO5:ENST00000391949.1 exon2:c.A64T>N;XRCO5:ENST00000391948.1 exon2:c.A64T>N;XRCO5:ENST00000391947.1 exon2:c.A64T>N;XRCO5:ENST00000391946.1 exon2:c.A64T>N;XRCO5:ENST00000391945.1 exon2:c.A64T>N;XRCO5:ENST00000391944.1 exon2:c.A64T>N;XRCO5:ENST00000391943.1 exon2:c.A64T>N;XRCO5:ENST00000391942.1 exon2:c.A64T>N;XRCO5:ENST00000391941.1 exon2:c.A64T>N;XRCO5:ENST00000391940.1 exon2:c.A64T>N;XRCO5:ENST00000391939.1 exon2:c.A64T>N;XRCO5:ENST00000391938.1 exon2:c.A64T>N;XRCO5:ENST00000391937.1 exon2:c.A64T>N;XRCO5:ENST00000391936.1 exon2:c.A64T>N;XRCO5:ENST00000391935.1 exon2:c.A64T>N;XRCO5:ENST00000391934.1 exon2:c.A64T>N;XRCO5:ENST00000391933.1 exon2:c.A64T>N;XRCO5:ENST00000391932.1 exon2:c.A64T>N;XRCO5:ENST00000391931.1 exon2:c.A64T>N;XRCO5:ENST00000391930.1 exon2:c.A64T>N;XRCO5:ENST00000391929.1 exon2:c.A64T>N;XRCO5:ENST00000391928.1 exon2:c.A64T>N;XRCO5:ENST00000391927.1 exon2:c.A64T>N;XRCO5:ENST00000391926.1 exon2:c.A64T>N;XRCO5:ENST00000391925.1 exon2:c.A64T>N;XRCO5:ENST00000391924.1 exon2:c.A64T>N;XRCO5:ENST00000391923.1 exon2:c.A64T>N;XRCO5:ENST00000391922.1 exon2:c.A64T>N;XRCO5:ENST00000391921.1 exon2:c.A64T>N;XRCO5:ENST00000391920.1 exon2:c.A64T>N;XRCO5:ENST00000391919.1 exon2:c.A64T>N;XRCO5:ENST00000391918.1 exon2:c.A64T>N;XRCO5:ENST00000391917.1 exon2:c.A64T>N;XRCO5:ENST00000391916.1 exon2:c.A64T>N;XRCO5:ENST00000391915.1 exon2:c.A64T>N;XRCO5:ENST00000391914.1 exon2:c.A64T>N;XRCO5:ENST00000391913.1 exon2:c.A64T>N;XRCO5:ENST00000391912.1 exon2:c.A64T>N;XRCO5:ENST00000391911.1 exon2:c.A64T>N;XRCO5:ENST00000391910.1 exon2:c.A64T>N;XRCO5:ENST00000391909.1 exon2:c.A64T>N;XRCO5:ENST00000391908.1 exon2:c.A64T>N;XRCO5:ENST00000391907.1 exon2:c.A64T>N;XRCO5:ENST00000391906.1 exon2:c.A64T>N;XRCO5:ENST00000391905.1 exon2:c.A64T>N;XRCO5:ENST00000391904.1 exon2:c.A64T>N;XRCO5:ENST00000391903.1 exon2:c.A64T>N;XRCO5:ENST00000391902.1 exon2:c.A64T>N;XRCO5:ENST00000391901.1 exon2:c.A64T>N;XRCO5:ENST00000391900.1 exon2:c.A64T>N;XRCO5:ENST00000391899.1 exon2:c.A64T>N;XRCO5:ENST00000391898.1 exon2:c.A64T>N;XRCO5:ENST00000391897.1 exon2:c.A64T>N;XRCO5:ENST00000391896.1 exon2:c.A64T>N;XRCO5:ENST00000391895.1 exon2:c.A64T>N;XRCO5:ENST00000391894.1 exon2:c.A64T>N;XRCO5:ENST00000391893.1 exon2:c.A64T>N;XRCO5:ENST00000391892.1 exon2:c.A64T>N;XRCO5:ENST00000391891.1 exon2:c.A64T>N;XRCO5:ENST00000391890.1 exon2:c.A64T>N;XRCO5:ENST00000391889.1 exon2:c.A64T>N;XRCO5:ENST00000391888.1 exon2:c.A64T>N;XRCO5:ENST00000391887.1 exon2:c.A64T>N;XRCO5:ENST00000391886.1 exon2:c.A64T>N;XRCO5:ENST00000391885.1 exon2:c.A64T>N;XRCO5:ENST00000391884.1 exon2:c.A64T>N;XRCO5:ENST00000391883.1 exon2:c.A64T>N;XRCO5:ENST00000391882.1 exon2:c.A64T>N;XRCO5:ENST00000391881.1 exon2:c.A64T>N;XRCO5:ENST00000391880.1 exon2:c.A64T>N;XRCO5:ENST00000391879.1 exon2:c.A64T>N;XRCO5:ENST00000391878.1 exon2:c.A64T>N;XRCO5:ENST00000391877.1 exon2:c.A64T>N;XRCO5:ENST00000391876.1 exon2:c.A64T>N;XRCO5:ENST00000391875.1 exon2:c.A64T>N;XRCO5:ENST00000391874.1 exon2:c.A64T>N;XRCO5:ENST00000391873.1 exon2:c.A64T>N;XRCO5:ENST00 |





estn

testn

36V.tissue=oesophagu

i1568E:tissue=large\_intestine&CSMD1\_ENST00000537824.basechange=c.5516G>A.AAchange=p.G1839E:tissue=large\_intest

SG00000156509.basechange=c.491C>T.AAchange=p.S164F:tissue=sk

stn

st

ju

r

sur

.573";tissue=endometrium&NLRP7;basechange=c.1934C>G;AAchange=p.S645";tissue=endometri

intestin

.E570";tissue=lung&L1RAPL1;basechange=c.1708G>T;AAchange=p.E570";tissue=lu

.IBEX1\_ENST00000372728;basechange=c.13G>T;AAchange=p.E5";tissue=large\_intest

| Chromosome | Position (hg) | Reference | Mutant allele | Sequence context      | ANNOVAR ft | Gene     | Mutation type     | ANNOVAR output (alternative transcripts)                                                                                                                                                                         |
|------------|---------------|-----------|---------------|-----------------------|------------|----------|-------------------|------------------------------------------------------------------------------------------------------------------------------------------------------------------------------------------------------------------|
| 1          | 152882979     | C         | T             | GCTGGAGCTC,CACAGCAGCA | exonic     | IVL      | nonsynonymous SNV | IVL:ENST00000368764.3:exon2:c.C706T;p.P236S,IVL:ENST00000392667.2:exon3:c.C268T;p.P90S,                                                                                                                          |
| 1          | 168510311     | G         | A             | TCTCACCAC,TTGGTTGG    | exonic     | XL2      | nonsynonymous SNV | XL2:ENST00000367819.2:exon3:c.C224T;p.T75M,                                                                                                                                                                      |
| 2          | 167141144     | C         | T             | GTTACTGCTG,GTGCTCCTG  | exonic     | SCN9A    | nonsynonymous SNV | SCN9A:ENST00000409672.1:exon12:c.G1793A;p.R598H,SCN9A:ENST00000454569.1:exon9:c.G1388A;p.R463H,SCN9A:ENST00000409435.1:exon11:c.G1793A;p.R598H,SCN9A:ENST00000375387.4:exon12:c.G1796A;p.R599H,SCN9A:ENST000004  |
| 3          | 119198789     | G         | C             | ATATATCTTT,ACAATGTGAC | exonic     | POGLUT1  | stoploss          | POGLUT1:ENST00000486607.1:exon5:c.G491C;p.X184S,                                                                                                                                                                 |
| 3          | 16984623      | A         | G             | GGCGAAACCG,GGAGACAA   | exonic     | SEC62    | nonsynonymous SNV | SEC62:ENST00000337002.4:exon1:c.A13G;p.R5G,SEC62:ENST00000469515.2:exon1:c.A13G;p.R5G,SEC62:ENST00000487708.1:exon1:c.A13G;p.R5G,SEC62:ENST00000460513.1:exon1:c.A13G;p                                          |
| 6          | 87726137      | G         | A             | ATTAGATGCC,AGAGCATACT | exonic     | HTR1E    | nonsynonymous SNV | HTR1E:ENST00000305344.5:exon2:c.G1085A;p.R362Q,                                                                                                                                                                  |
| 7          | 122221277     | C         | T             | CCAGTGCTTT,TTGTAAGAGT | exonic     | CADPS2   | nonsynonymous SNV | CADPS2:ENST00000412584.2:exon7:c.G1291A;p.E431K,CADPS2:ENST00000313070.7:exon7:c.G1291A;p.E431K,CADPS2:ENST00000449022.2:exon7:c.G1291A;p.E431K,                                                                 |
| 7          | 137266651     | G         | C             | GGCTGAAGTA,TTATTGAAAA | exonic     | DGKI     | nonsynonymous SNV | DGKI:ENST00000453654.2:exon15:c.C687G;p.N229K,DGKI:ENST00000446122.1:exon15:c.C1587G;p.N529K,DGKI:ENST00000424189.2:exon15:c.C1587G;p.N529K,DGKI:ENST00000288490.5:exon15:c.C1587G;p.N529K,                      |
| 7          | 150217958     | C         | T             | AAGTTTTATT,TTCTAATTT  | exonic     | GIMAP7   | nonsynonymous SNV | GIMAP7:ENST00000313543.4:exon2:c.C896T;p.S299F,                                                                                                                                                                  |
| 7          | 150217961     | C         | T             | TTTTATTCTT,CTAATTACT  | exonic     | GIMAP7   | nonsynonymous SNV | GIMAP7:ENST00000313543.4:exon2:c.C899T;p.S300F,                                                                                                                                                                  |
| 8          | 110527432     | C         | G             | TTCCACACTT,AACTTTTGA  | exonic     | PKHD1L1  | nonsynonymous SNV | PKHD1L1:ENST00000378402.5:exon72:c.C11587G;p.Q3863E,PKHD1L1:ENST00000526472.1:exon18:c.C2371G;p.Q791E,                                                                                                           |
| 11         | 64757197      | G         | C             | TGCACGTGCA,GGTCCGGCTC | exonic     | BATF2    | nonsynonymous SNV | BATF2:ENST00000534177.1:exon3:c.C226G;p.L76V,BATF2:ENST00000527716.1:exon2:c.C157G;p.L53V,BATF2:ENST00000301887.4:exon3:c.C229G;p.L77V,                                                                          |
| 12         | 11138642      | G         | A             | TGAGTCGAAT,CAAGATATAT | exonic     | TAS2R50  | nonsynonymous SNV | TAS2R50:ENST00000506688.1:exon1:c.C818T;p.A273V,                                                                                                                                                                 |
| 12         | 50045835      | C         | T             | CATGCCCTCA,TCAGCTCTCG | exonic     | FMNL3    | nonsynonymous SNV | FMNL3:ENST00000352151.5:exon13:c.G1331A;p.S444N,FMNL3:ENST00000335154.5:exon14:c.G1484A;p.S495N,FMNL3:ENST00000550488.1:exon14:c.G1484A;p.S495N,FMNL3:ENST00000293590.5:exon14:c.G1484A;p.S495N,                 |
| 12         | 85441073      | G         | A             | GAAAAATGTA,ACAGTCTTTT | exonic     | LRRIQ1   | nonsynonymous SNV | LRRIQ1:ENST00000393217.2:exon6:c.G503A;p.R168K,                                                                                                                                                                  |
| 14         | 101347482     | C         | T             | GGGTTCTTGA,GCAGGGCAGG | exonic     | RTL1     | nonsynonymous SNV | RTL1:ENST00000544062.1:exon1:c.G364A;p.R1215H,                                                                                                                                                                   |
| 15         | 40253993      | G         | A             | ACGCGAGAAC,TCAGTATTCT | exonic     | EIF2AK4  | nonsynonymous SNV | EIF2AK4:ENST00000382727.2:exon7:c.G752A;p.R251H,EIF2AK4:ENST00000263791.5:exon7:c.G752A;p.R251H,EIF2AK4:ENST00000559624.1:exon7:c.G752A;p.R251H,                                                                 |
| 16         | 4812577       | T         | C             | TACTCACCTC,CTCTGGCCAC | exonic     | ZNF500   | nonsynonymous SNV | ZNF500:ENST00000545009.1:exon3:c.A595G;p.R199G,ZNF500:ENST00000219478.6:exon3:c.A595G;p.R199G,                                                                                                                   |
| 17         | 39254126      | C         | T             | CAGCTGGACA,ACAGCAGCTG | exonic     | KRTAP4-8 | nonsynonymous SNV | KRTAP4-8:ENST0000033822.4:exon1:c.G211A;p.V71M,                                                                                                                                                                  |
| 20         | 18440840      | G         | C             | CCATCAGGCA,AGTAATAGGT | exonic     | DZANK1   | nonsynonymous SNV | DZANK1:ENST00000608192.1:exon3:c.C220G;p.L74V,DZANK1:ENST00000262547.5:exon3:c.C220G;p.L74V,DZANK1:ENST00000329494.5:exon3:c.C220G;p.L74V,DZANK1:ENST00000609267.1:exon3:c.C220G;p.L74V,DZANK1:ENST00000377630.5 |

3,large\_intesti

19N:tissue=endometrium&DGKI:basechange=c.1587C>T:AChange=p.N529N:tissue=endometr

truu







|    |          |   |                        |        |                     |
|----|----------|---|------------------------|--------|---------------------|
| 15 | 45611648 | G | CADCGTTTTAAATGATCTT    | exonic | GATH                |
| 15 | 51722885 | G | GCAACATCTCTACTGAGT     | exonic | DMXL2               |
| 15 | 52035566 | C | ACTACGTTTAATAATGAT     | exonic | NEODM               |
| 15 | 57910313 | T | AGATCAAMAAAGCAAGAA     | exonic | GCOM1_MYZAP         |
| 15 | 64017635 | C | ATTGTTTITAGATCACA      | exonic | HEB_C1              |
| 15 | 66791804 | G | TTCTTTCAG_GGCTGGTCT    | exonic | RPL4                |
| 15 | 77795549 | A | CTTCTTCAAGAGCTCCGAGA   | exonic | HMG20A              |
| 15 | 79750488 | C | CACAGCTCTCCAGCGAAG     | exonic | BLA                 |
| 15 | 81046666 | C | GAGGCTCTCC_CCGAGCGTG   | exonic | ABHD17C             |
| 15 | 83438603 | C | GTTTGCTACTACGAATTA     | exonic | FSO2                |
| 15 | 83521308 | C | TGTTCTCTTTGAATTTGGT    | exonic | SLC12A4             |
| 15 | 89395189 | G | TGCGCTCTAAAGTCCACAC    | exonic | ACAN                |
| 15 | 90039699 | T | CGAGGAGGTC_GAAGAAAGT   | exonic | ZNF774              |
| 15 | 91347415 | G | FATGGAAACA_AAAATCTCCAG | exonic | BLA                 |
| 15 | 94422310 | G | AAAGATTAAG_CAAAGATCTT  | exonic | MCR22               |
| 15 | 26157202 | C | CCCAAGGCAC_GAGGAAAGCT  | exonic | SRRM2               |
| 15 | 11034654 | C | CGCTTTGCGG_CAGCGCAGC   | exonic | MNF25               |
| 15 | 3434278  | C | CACAGGCTCTTCTCACTTC    | exonic | ZSCAN3L             |
| 15 | 3591889  | C | COTGGCCGCG_AGTCCCGCAT  | exonic | NLRC3               |
| 15 | 4539722  | C | CGGCTGCTGCTTTGATGCG    | exonic | SLC14               |
| 15 | 21008782 | T | ATGTTGAGGTATTGGCGGAA   | exonic | DNAH3               |
| 15 | 23464533 | T | ACTTGATCCTTTATTTTAT    | exonic | PALB2               |
| 15 | 24246523 | T | TGTTCTGTCAA_AAGCTGGTCA | exonic | RHCP41P17           |
| 15 | 55683700 | C | GAGGAGGCTTAATAAAAGT    | exonic | CESSA               |
| 15 | 66838906 | T | CCCGCGACTT_CCGCGCCAAA  | exonic | TK2                 |
| 15 | 69232947 | C | GAGCGGCTCT_GAAGTGGCA   | exonic | SLC12A4             |
| 15 | 69664472 | C | GTTGGTGGCCAA_CCGGCGACC | exonic | DDX28               |
| 15 | 71610150 | G | ACATGAGCTC_GATTGGGTTG  | exonic | TAT                 |
| 15 | 88496959 | G | CCGCTCCCGAA_GAGGAGTGA  | exonic | ZNF469              |
| 15 | 89329497 | G | GGAGATTCAT_AAGCTTCCCTG | exonic | ZNF469              |
| 15 | 89795707 | C | CGACTGCTCTT_AAGCTTACC  | exonic | ZNF276              |
| 15 | 90026290 | C | TTCCTGCTCTT_CCTGGGCTCA | exonic | DEFB                |
| 15 | 90158617 | C | CACCTTTCGA_GATGAGGCTCC | exonic | DDX28               |
| 15 | 986762   | C | CGGCTACTCTT_GATGATCTTC | exonic | ABR_NEST000057142.1 |
| 15 | 1939605  | T | ACAACTTTGAATTTCCCAAG   | exonic | DPH1                |
| 15 | 31815233 | C | GAACCGACTT_GTCAGACTCC  | exonic | OR3A2               |
| 15 | 31956688 | G | GTATAGGCGG_TGTGAGTTAT  | exonic | OR3A1               |
| 15 | 36287117 | G | TCCAGCCTCTT_AAGCTTGGCT | exonic | ATP2A3              |
| 15 | 4486244  | G | TGCGGCTCCTT_AAGTCTGGTG | exonic | SMN2                |
| 15 | 4883766  | G | GTCGCTGCTT_GAAGCTGACC  | exonic | CAMTA2              |
| 15 | 7098610  | A | GTCTTGGTGG_GGCCAAGCTC  | exonic | DLG4                |
| 15 | 9295868  | C | AACTCACTGA_AACTATGATC  | exonic | NEURL4              |
| 15 | 12504110 | A | AATCGCGAGC_GAAGGAGGAC  | exonic | C3P1                |
| 15 | 17343026 | C | AGAACCTTCTT_CCTCTTGGAC | exonic | SHBG                |
| 15 | 17877010 | T | GGAGCGGCTT_AGGAGGAGT   | exonic | TPS38B              |
| 15 | 7678188  | T | TACTGGTCTT_CAAATGACAG  | exonic | DNAH2               |
| 15 | 8215376  | C | CCAGTCCGCTT_CTCGACGACC | exonic | ARRHG15             |
| 15 | 8434562  | C | FATCGGCTCC_AAAGGCTGGC  | exonic | MYOC                |
| 15 | 12639462 | A | AGCTGCTCTG_GAGCAACAAC  | exonic | ACO3538_1.MYOC      |
| 15 | 12647507 | C | GATGTCAAAAT_CTTGGGTGCT | exonic | ACO3538_1.MYOC      |
| 15 | 12656433 | C | CCAGGCTTCT_GAAGATGAGC  | exonic | ACO3538_1.MYOC      |
| 15 | 15973811 | G | AGTGAACCTG_AATGATGGTG  | exonic | NCO11               |
| 15 | 16395180 | C | GCCGCCGCGC_CCGCCTGCTC  | exonic | FAM21A              |
| 15 | 16398510 | C | CCAACTTGAA_TGGTCTTGGT  | exonic | NLRC3               |
| 15 | 18881189 | C | GGAAGCTGCTT_AAGTCTGGTC | exonic | FAM33G              |
| 15 | 26715283 | C | AAGCAAGTGT_CCAAGCTGGC  | exonic | SARM1               |
| 15 | 27925625 | C | TCAGGCTCTT_AAGCTGGTCC  | exonic | TLCE3               |
| 15 | 29183993 | G | GTGCGATTG_AACCCACCTC   | exonic | ATAD5               |
| 15 | 30274665 | G | GATGATTTT_AAAGATGACT   | exonic | SUF2F2              |
| 15 | 30521255 | C | GCGCTTCTT_CTCACAAATG   | exonic | RHNOB3              |
| 15 | 30964090 | T | TCTCAAGCTT_ACAACTAGT   | exonic | ZNF207              |
| 15 | 34894142 | G | GCCCGGCGCG_TGGCGTCCGC  | exonic | MRM1                |
| 15 | 35585181 | A | GCGCAATTCG_CAGCACTGGC  | exonic | SYNRG1              |
| 15 | 36731149 | A | GCCCGGAGCG_GGGCGAGTGC  | exonic | SRGN1               |
| 15 | 37439073 | G | GTCAACCAAG_AAATGTTCAA  | exonic | FXB120              |
| 15 | 37898919 | A | CCCGCGCTCT_GAGTCTGGTC  | exonic | STAT5A              |
| 15 | 40447783 | C | CACTTCACTG_CAGCTGAGTC  | exonic | STAT5A              |
| 15 | 41003806 | C | TCGGCTCACC_CTCCTGACTG  | exonic | GUC1                |
| 15 | 42862827 | C | CCGGCTGCTT_CCGGCTGGCT  | exonic | AOC3                |
| 15 | 44467163 | C | CGCCGCGCTT_AGTGTTGGTG  | exonic | WNT3                |
| 15 | 46509000 | G | TTCGTGGACA_AAGCGACTCG  | exonic | CDKSRAP3            |
| 15 | 47218648 | A | TGTCCTAACT_CTCGATCTGT  | exonic | BACAL21P3           |
| 15 | 47265449 | T | CCGAAAGATG_AATCTCAACT  | exonic | MK51                |
| 15 | 58330564 | C | TTCCTCACTT_AAAGAGCTG   | exonic | LPF32               |
| 15 | 60088536 | T | TGTGTTCTCT_AACTAAAGAT  | exonic | MED13               |
| 15 | 61903476 | C | GCGAGCACTG_CCTTCAAGAT  | exonic | FTL3                |
| 15 | 71231635 | T | AGTGAATAT_CACCGACAAG   | exonic | C17orf80            |
| 15 | 73734247 | C | TGCGGCTGCTT_CTCGGGAGC  | exonic | ITGB8               |
| 15 | 75266589 | C | GATCGCCAGT_AAGCTCGTAT  | exonic | RHBDF2              |
| 15 | 76183457 | A | AGCGGCTAGT_GATGTTGGTG  | exonic | AFM1D               |
| 15 | 76183458 | A | CGCTCAGTAT_GATGTTGGTG  | exonic | AFM1D               |
| 15 | 76183459 | A | CGCAACATCA_CCTCTCTCTT  | exonic | NM00017             |
| 15 | 76183460 | A | CGCAGCACTG_AATTTGGGTT  | exonic | RNF123              |
| 15 | 76822117 | C | GTCTTGCTGG_CCTCTCGACG  | exonic | SLC25A10            |
| 15 | 76848193 | C | CGCCGCTAGT_TGCGTCTGTC  | exonic | CDFR                |
| 15 | 79842762 | C | GGTTTCTAGT_AAGCTGTACT  | exonic | ALYRF               |
| 15 | 79918493 | C | CGAGTCCACC_AAGTGTTTGAG | exonic | NOTUM               |
| 15 | 79918494 | C | AAAGTCGACA_CTTCTCGAGT  | exonic | SOX22               |
| 15 | 12802143 | C | AAAGTCTCTT_CATGCTTTCT  | exonic | PTNP2               |
| 15 | 12802144 | C | AAAGTCTCTT_CATGCTTTCT  | exonic | PTNP2               |
| 15 | 13232516 | C | GGGAAAGTAT_AATTGAGTGT  | exonic | PTRN1               |
| 15 | 13232517 | C | TTTCAATCAI_AAGTACCATC  | exonic | ROCK1               |
| 15 | 13232518 | C | TTTCAATCAI_AAGTACCATC  | exonic | GREB1L              |
| 15 | 13232519 | C | TTTCAATCAI_AAGTACCATC  | exonic | MI6                 |
| 15 | 13232520 | C | TTTCAATCAI_AAGTACCATC  | exonic | LAMA3               |
| 15 | 13232521 | C | TTTCAATCAI_AAGTACCATC  | exonic | KLHL4               |
| 15 | 13232522 | C | TTTCAATCAI_AAGTACCATC  | exonic | KLHL4               |
| 15 | 13232523 | C | TTTCAATCAI_AAGTACCATC  | exonic | CCDC178             |
| 15 | 13232524 | C | TTTCAATCAI_AAGTACCATC  | exonic | ASXL3               |
| 15 | 13232525 | C | TTTCAATCAI_AAGTACCATC  | exonic | ASXL3               |
| 15 | 13232526 | C | TTTCAATCAI_AAGTACCATC  | exonic | TPS2                |
| 15 | 13232527 | C | TTTCAATCAI_AAGTACCATC  | exonic | TPS2                |
| 15 | 13232528 | C | TTTCAATCAI_AAGTACCATC  | exonic | KOR2L               |
| 15 | 13232529 | C | TTTCAATCAI_AAGTACCATC  | exonic | CEBE1               |
| 15 | 13232530 | C | TTTCAATCAI_AAGTACCATC  | exonic | ZNF236              |
| 15 | 13232531 | C | TTTCAATCAI_AAGTACCATC  | exonic | ZNF236              |
| 15 | 13232532 | C | TTTCAATCAI_AAGTACCATC  | exonic | ZNF236              |
| 15 | 13232533 | C | TTTCAATCAI_AAGTACCATC  | exonic | ZNF236              |
| 15 | 13232534 | C | TTTCAATCAI_AAGTACCATC  | exonic | ZNF236              |
| 15 | 13232535 | C | TTTCAATCAI_AAGTACCATC  | exonic | ZNF236              |
| 15 | 13232536 | C | TTTCAATCAI_AAGTACCATC  | exonic | ZNF236              |
| 15 | 13232537 | C | TTTCAATCAI_AAGTACCATC  | exonic | ZNF236              |
| 15 | 13232538 | C | TTTCAATCAI_AAGTACCATC  | exonic | ZNF236              |
| 15 | 13232539 | C | TTTCAATCAI_AAGTACCATC  | exonic | ZNF236              |
| 15 | 13232540 | C | TTTCAATCAI_AAGTACCATC  | exonic | ZNF236              |
| 15 | 13232541 | C | TTTCAATCAI_AAGTACCATC  | exonic | ZNF236              |
| 15 | 13232542 | C | TTTCAATCAI_AAGTACCATC  | exonic | ZNF236              |
| 15 | 13232543 | C | TTTCAATCAI_AAGTACCATC  | exonic | ZNF236              |
| 15 | 13232544 | C | TTTCAATCAI_AAGTACCATC  | exonic | ZNF236              |
| 15 | 13232545 | C | TTTCAATCAI_AAGTACCATC  | exonic | ZNF236              |
| 15 | 13232546 | C | TTTCAATCAI_AAGTACCATC  | exonic | ZNF236              |
| 15 | 13232547 | C | TTTCAATCAI_AAGTACCATC  | exonic | ZNF236              |
| 15 | 13232548 | C | TTTCAATCAI_AAGTACCATC  | exonic | ZNF236              |
| 15 | 13232549 | C | TTTCAATCAI_AAGTACCATC  | exonic | ZNF236              |
| 15 | 13232550 | C | TTTCAATCAI_AAGTACCATC  | exonic | ZNF236              |
| 15 | 13232551 | C | TTTCAATCAI_AAGTACCATC  | exonic | ZNF236              |
| 15 | 13232552 | C | TTTCAATCAI_AAGTACCATC  | exonic | ZNF236              |
| 15 | 13232553 | C | TTTCAATCAI_AAGTACCATC  | exonic | ZNF236              |
| 15 | 13232554 | C | TTTCAATCAI_AAGTACCATC  | exonic | ZNF236              |
| 15 | 13232555 | C | TTTCAATCAI_AAGTACCATC  | exonic | ZNF236              |
| 15 | 13232556 | C | TTTCAATCAI_AAGTACCATC  | exonic | ZNF236              |
| 15 | 13232557 | C | TTTCAATCAI_AAGTACCATC  | exonic | ZNF236              |
| 15 | 13232558 | C | TTTCAATCAI_AAGTACCATC  | exonic | ZNF236              |
| 15 | 13232559 | C | TTTCAATCAI_AAGTACCATC  | exonic | ZNF236              |
| 15 | 13232560 | C | TTTCAATCAI_AAGTACCATC  | exonic | ZNF236              |
| 15 | 13232561 | C | TTTCAATCAI_AAGTACCATC  | exonic | ZNF236              |
| 15 | 13232562 | C | TTTCAATCAI_AAGTACCATC  | exonic | ZNF236              |
| 15 | 13232563 | C | TTTCAATCAI_AAGTACCATC  | exonic | ZNF236              |
| 15 | 13232564 | C | TTTCAATCAI_AAGTACCATC  | exonic | ZNF236              |
| 15 | 13232565 | C | TTTCAATCAI_AAGTACCATC  | exonic | ZNF236              |
| 15 | 13232566 | C | TTTCAATCAI_AAGTACCATC  | exonic | ZNF236              |
| 15 | 13232567 | C | TTTCAATCAI_AAGTACCATC  | exonic | ZNF236              |
| 15 | 13232568 | C | TTTCAATCAI_AAGTACCATC  | exonic | ZNF236              |
| 15 | 13232569 | C | TTTCAATCAI_AAGTACCATC  | exonic | ZNF236              |
| 15 | 13232570 | C | TTTCAATCAI_AAGTACCATC  | exonic | ZNF236              |
| 15 | 13232571 | C | TTTCAATCAI_AAGTACCATC  | exonic | ZNF236              |
| 15 | 13232572 | C | TTTCAATCAI_AAGTACCATC  | exonic | ZNF236              |
| 15 | 13232573 | C | TTTCAATCAI_AAGTACCATC  | exonic | ZNF236              |
| 15 | 13232574 | C | TTTCAATCAI_AAGTACCATC  | exonic | ZNF236              |
| 15 | 13232575 | C | TTTCAATCAI_AAGTACCATC  | exonic | ZNF236              |
| 15 | 13232576 | C | TTTCAATCAI_AAGTACCATC  | exonic | ZNF236              |
| 15 | 13232577 | C | TTTCAATCAI_AAGTACCATC  | exonic | ZNF236              |
| 15 | 13232578 | C | TTTCAATCAI_AAGTACCATC  | exonic | ZNF236              |
| 15 | 13232579 | C | TTTCAATCAI_AAGTACCATC  | exonic | ZNF236              |
| 15 | 13232580 | C | TTTCAATCAI_AAGTACCATC  | exonic | ZNF236              |
| 15 | 13232581 | C | TTTCAATCAI_AAGTACCATC  | exonic | ZNF236              |
| 15 | 13232582 | C | TTTCAATCAI_AAGTACCATC  | exonic | ZNF236              |
| 15 | 13232583 | C | TTTCAATCAI_AAGTACCATC  | exonic | ZNF236              |
| 15 | 13232584 | C | TTTCAATCAI_AAGTACCATC  | exonic | ZNF236              |
| 15 | 13232585 | C | TTTCAATCAI_AAGTACCATC  | exonic | ZNF236              |
| 15 | 13232586 | C | TTTCAATCAI_AAGTACCATC  | exonic | ZNF236              |
| 15 | 13232587 | C | TTTCAATCAI_AAGTACCATC  | exonic | ZNF236              |
| 15 | 13232588 | C | TTTCAATCAI_AAGTACCATC  | exonic | ZNF236              |
| 15 | 13232589 | C | TTTCAATCAI_AAGTACCATC  | exonic | ZNF236              |
| 15 | 13232590 | C | TTTCAATCAI_AAGTACCATC  | exonic | ZNF236              |
| 15 | 13232591 | C | TTTCAATCAI_AAGTACCATC  | exonic | ZNF236              |
| 15 | 13232592 | C | TTTCAATCAI_AAGTACCATC  | exonic | ZNF236              |
| 15 | 13232593 | C | TTTCAATCAI_AAGTACCATC  | exonic | ZNF236              |
| 15 | 13232594 | C | TTTCAATCAI_AAGTACCATC  | exonic | ZNF236              |
| 15 | 13232595 | C | TTTCAATCAI_AAGTACCATC  | exonic | ZNF236              |
| 15 | 13232596 | C | TTTCAATCAI_AAGTACCATC  | exonic | ZNF236              |
| 15 | 13232597 | C | TTTCAATCAI_AAGTACCATC  | exonic | ZNF236              |
| 15 | 13232598 | C | TTTCAATCAI_AAGTACCATC  | exonic | ZNF236              |
| 15 | 13232599 | C | TTTCAATCAI_AAGTACCATC  | exonic | ZNF236              |
| 15 | 13232600 | C | TTTCAATCAI_AAGTACCATC  | exonic | ZNF236              |



|   |           |   |   |                      |        |    |          |                                                                                                                                                                                                                                                        |
|---|-----------|---|---|----------------------|--------|----|----------|--------------------------------------------------------------------------------------------------------------------------------------------------------------------------------------------------------------------------------------------------------|
| X | 37545217  | G | A | GGCGGGAGTAAATTCGGG   | exonic | XX | nonsense | XX:ENST00000378616.3:exon1:c.G3A:p.M11.                                                                                                                                                                                                                |
| X | 41555743  | G | A | CATCCCTTTCATCATCTAC  | exonic | XX | nonsense | GPR34:ENST00000378158.5:exon3:c.G857A:p.R286Q.                                                                                                                                                                                                         |
| X | 47511482  | C | T | GCTCTCACCTAGCAACATG  | exonic | XX | nonsense | UXT:ENST0000035890.2:exon5:c.G454A:p.E152K.UXT:ENST00000333119.3:exon6:c.G418A:p.E140K.                                                                                                                                                                |
| X | 48434879  | G | C | ACGTCCCAAGACTATAATGG | exonic | XX | nonsense | RBM3:ENST00000354480.2:exon2:c.G318C:p.E106D.RBM3:ENST00000376755.1:exon4:c.G400C:p.D134H.RBM3:ENST00000430348.2:exon4:c.G318C:p.E106D.                                                                                                                |
| X | 48543884  | C | T | TCGCCCCCAACCCCTTCTTC | exonic | XX | nonsense | WAS:ENST00000370701.4:exon3:c.C3327:p.T1111.WAS:ENST00000460772.1:exon5:c.C3327:p.T1111.                                                                                                                                                               |
| X | 48565911  | C | T | GAAGCGGGTCGTATTGAATG | exonic | XX | nonsense | SUV39H1:ENST00000337852.6:exon6:c.C12221:p.R408C.SUV39H1:ENST00000376887.3:exon6:c.C1189T:p.R397C.                                                                                                                                                     |
| X | 4896765   | C | T | GGCGCTGTCCGACGCTCACG | exonic | XX | nonsense | TFE3:ENST00000315869.7:exon3:c.G401A:p.R134Q.                                                                                                                                                                                                          |
| X | 49066604  | C | T | AGCTCAACGCTGGTGGGGGG | exonic | XX | nonsense | CACNA1F:ENST00000376251.1:exon4:c.G4525A:p.D1509N.CACNA1F:ENST00000376255.2:exon40:c.G4720A:p.D1574N.CACNA1F:ENST00000323022.5:exon40:c.G4687A:p.D1563N.                                                                                               |
| X | 53283848  | C | T | CCGGTGGCTGGCCACACGAG | exonic | XX | nonsense | IQSEC2:ENST00000375365.2:exon4:c.G650A:p.R217Q.IQSEC2:ENST00000396435.3:exon4:c.G1265A:p.R422Q.IQSEC2:ENST00000375368.5:exon3:c.G1235A:p.R412Q.                                                                                                        |
| X | 62855285  | G | A | TGAGGAAAGGAGCTCAGGG  | exonic | XX | nonsense | ARHGEP9:ENST00000374878.7:exon7:c.C1351T:p.P451S.                                                                                                                                                                                                      |
| X | 67940227  | G | A | GAGCATTGAGAGCGATGGG  | exonic | XX | nonsense | STARDB8:ENST0000034599.3:exon8:c.C2011G:p.G817E.STARDB8:ENST00000252336.6:exon7:c.C1771G:p.Q591E.STARDB8:ENST00000374597.3:exon7:c.C1771G:p.Q591E.                                                                                                     |
| X | 67941564  | C | T | CTCAATGCTCTAAGAAAGAT | exonic | XX | nonsense | STARDB8:ENST00000374599.3:exon10:c.C2435T:p.S812F.STARDB8:ENST00000252336.6:exon9:c.C2195T:p.S732F.STARDB8:ENST00000374597.3:exon9:c.C2195T:p.S732F.                                                                                                   |
| X | 69353912  | C | T | CCGATAGTCAGGAGAAAGT  | exonic | XX | nonsense | IGBP1:ENST00000356413.4:exon2:c.C1157:p.Q39X.IGBP1:ENST00000342206.6:exon1:c.C1157:p.Q39X.                                                                                                                                                             |
| X | 69421915  | G | A | TGGAAACAGGGTGGCTCCAA | exonic | XX | nonsense | DGA12L1:ENST00000333028.3:exon5:c.G47+1G.                                                                                                                                                                                                              |
| X | 70339188  | G | A | CTTCCCTAAGAAAAACAA   | exonic | XX | nonsense | MED1:ENST00000429213.1:exon2:c.20-1G(A).                                                                                                                                                                                                               |
| X | 73811873  | G | C | AGTAGGCTCTAGTCGCTACT | exonic | XX | nonsense | RLIM:ENST00000332887.6:exon4:c.C1277G:p.S426X.RLIM:ENST00000349225.2:exon5:c.C1277G:p.S426X.                                                                                                                                                           |
| X | 76837199  | C | G | TTCTCTTTTTCCTTGACAA  | exonic | XX | nonsense | ATRX:ENST00000373344.4:exon9:c.G3549C:p.E1183D.ATRX:ENST00000395603.3:exon8:c.G3435C:p.E1145D.                                                                                                                                                         |
| X | 83129181  | G | A | AATGGATCTATTGGAGTT   | exonic | XX | nonsense | CYL1C:ENST00000329312.4:exon4:c.G1465A:p.D489N.                                                                                                                                                                                                        |
| X | 84526170  | G | A | TGTATTTCAGTGTCCAGAT  | exonic | XX | nonsense | ZNF711:ENST00000360700.4:exon10:c.G1769A:p.R587K.ZNF711:ENST00000542788.1:exon7:c.G1148A:p.R383K.ZNF711:ENST00000276123.3:exon10:c.G1622A:p.R541K.ZNF711:ENST00000395402.1:exon9:c.G1646A:p.R549K.ZNF711:ENST00000373165.3:exon9:c.G1622A:p.R541K.     |
| X | 86893982  | C | T | TATTGGTGGAGTGGATGAAG | exonic | XX | nonsense | KLHL4:ENST0000037119.4:exon2:c.C17327:p.R579C.KLHL4:ENST0000037114.4:exon9:c.C17327:p.R579C.                                                                                                                                                           |
| X | 102471224 | G | A | ATAGCTGGAGAAATACGAG  | exonic | XX | nonsense | BEX4:ENST00000372891.3:exon2:c.G143A:p.G48E.BEX4:ENST00000372895.5:exon3:c.G143A:p.G48E.                                                                                                                                                               |
| X | 104463988 | G | A | ATAGGCGAGGAGCTGGACAG | exonic | XX | nonsense | TEX13A:ENST00000372575.1:exon3:c.C890T:p.S297F.TEX13A:ENST00000372578.3:exon3:c.C890T:p.S297F.                                                                                                                                                         |
| X | 10639610  | A | C | CTGCTGTGACGGATAAATC  | exonic | XX | nonsense | NUP200CL:ENST00000374965.4:exon7:c.T422G:p.L141R.                                                                                                                                                                                                      |
| X | 106891314 | G | A | GGCAAAGTGGGATTGATAAA | exonic | XX | nonsense | GUCY2F:ENST00000218006.2:exon6:c.C15537:p.P516L.                                                                                                                                                                                                       |
| X | 11202236  | G | A | TGTTTGTCTGATTCAGAT   | exonic | XX | nonsense | AMOT:ENST00000371962.1:exon10:c.C2460T:p.P817L.AMOT:ENST00000524145.1:exon11:c.C3146T:p.P1049L.AMOT:ENST00000371969.3:exon10:c.C3146T:p.P1049L.                                                                                                        |
| X | 11442654  | C | T | AGGGGGGATGGCGATGCG   | exonic | XX | nonsense | RBML3:ENST00000424775.3:exon1:c.C2830T:p.S977L.                                                                                                                                                                                                        |
| X | 117033075 | T | A | CCACATAGATTATTTTCCA  | exonic | XX | nonsense | KLHL13:ENST00000371882.1:exon7:c.A1611T:p.K537N.KLHL13:ENST00000371878.1:exon7:c.A1611T:p.K537N.KLHL13:ENST00000524145.1:exon8:c.A1716T:p.K588N.KLHL13:ENST00000541812.1:exon8:c.A1716T:p.K572N.KLHL13:ENST00000371876.1:exon8:c.A1611T:p.K537N.       |
| X | 12568573  | G | A | TTCCACAGGTGAATGAGCG  | exonic | XX | nonsense | DCAF12L1:ENST00000371126.1:exon1:c.C859T:p.H287Y.                                                                                                                                                                                                      |
| X | 129186538 | G | A | CAGCTCAGAGAGGCTCAGCA | exonic | XX | nonsense | BCORL1:ENST00000459622.1:exon6:c.G321A:p.E1072K.BCORL1:ENST00000303743.5:exon6:c.G4414A:p.E1472K.                                                                                                                                                      |
| X | 129333940 | C | G | GCTGTGGCTGCTGCTCTCA  | exonic | XX | nonsense | ELF4:ENST00000356977.7:exon8:c.G922C:p.E306Q.ELF4:ENST00000308167.5:exon8:c.G922C:p.E306Q.                                                                                                                                                             |
| X | 130220344 | G | A | AGCGCGTGTGAGTCCAGCC  | exonic | XX | nonsense | ARHGAP36:ENST00000412432.2:exon10:c.G1230A:p.W410X.ARHGAP36:ENST00000370922.1:exon10:c.G1287A:p.W429X.ARHGAP36:ENST00000276211.5:exon10:c.G1323A:p.W441X.                                                                                              |
| X | 130409948 | C | T | TCACCCAGATATAAGGGGCA | exonic | XX | nonsense | IGSF1:ENST00000370603.3:exon15:c.C2968A:p.M960I.IGSF1:ENST00000370904.1:exon2:c.G2856A:p.M952I.IGSF1:ENST00000370910.1:exon14:c.G2856A:p.M952I.IGSF1:ENST00000361420.3:exon15:c.G2853A:p.M961I.                                                        |
| X | 132181857 | G | A | TTTGTGGAATAGTTTTGTT  | exonic | XX | nonsense | USP26:ENST00000406273.1:exon2:c.C3927:p.S131L.USP26:ENST00000511190.1:exon6:c.C3927:p.S131L.USP26:ENST00000370832.1:exon1:c.C3927:p.S131L.                                                                                                             |
| X | 133378945 | G | A | AAACAGTGCATAGCAGCAA  | exonic | XX | nonsense | CCDC160:ENST00000370809.4:exon2:c.G115A:p.D39N.CCDC160:ENST00000517294.1:exon3:c.G115A:p.D39N.                                                                                                                                                         |
| X | 135674131 | G | A | ATTAATCCCAAGAGAAAT   | exonic | XX | nonsense | BRS3:ENST00000370848.3:exon3:c.G797A:p.R206Q.                                                                                                                                                                                                          |
| X | 13668674  | G | A | GTACTTTTACAAKCTCATGC | exonic | XX | nonsense | ATP11C:ENST00000316468.2:exon19:c.C2200T:p.P734S.ATP11C:ENST00000327569.3:exon19:c.C2200T:p.P734S.ATP11C:ENST00000359866.2:exon19:c.C2200T:p.P734S.ATP11C:ENST00000370557.1:exon19:c.C2191T:p.P731S.ATP11C:ENST00000370543.1:exon19:c.C2200T:p.P731S.  |
| X | 13603351  | C | T | TGACAAATTCAGCTAATCA  | exonic | XX | nonsense | CXorf66:ENST00000370540.1:exon3:c.G790A:p.E264K.                                                                                                                                                                                                       |
| X | 14099322  | C | T | CTCCATTTTCAGAGTCTCT  | exonic | XX | nonsense | MAGEC1:ENST00000285879.4:exon4:c.C2132T:p.P711L.                                                                                                                                                                                                       |
| X | 147743691 | C | T | CCATGCTCTACCTCTGTT   | exonic | XX | nonsense | AF2:ENST00000370458.1:exon3:c.C401T:p.P134L.AF2:ENST00000370457.5:exon3:c.C401T:p.P134L.AF2:ENST00000370460.2:exon3:c.C413T:p.P138L.AF2:ENST00000342251.3:exon3:c.C401T:p.P134L.                                                                       |
| X | 14803252  | C | T | TGAGGCGACCTGTGGCAC   | exonic | XX | nonsense | AF2:ENST00000286437.5:exon7:c.C403T:p.R155C.AF2:ENST00000370457.5:exon9:c.C1441T:p.R481C.AF2:ENST00000370460.2:exon10:c.C1540T:p.R514C.AF2:ENST00000342251.3:exon9:c.C1441T:p.R481C.                                                                   |
| X | 148638792 | G | A | AGCAAGCAGGCTGCTGAC   | exonic | XX | nonsense | MAML1:ENST00000432980.2:exon3:c.G872A:p.G291E.MAML1:ENST00000370405.1:exon2:c.G947A:p.G316E.MAML1:ENST00000292958.5:exon3:c.G947A:p.G316E.MAML1:ENST00000426613.2:exon2:c.G872A:p.G291E.                                                               |
| X | 14902430  | C | A | ACGATGGAATCACGGATGAG | exonic | XX | nonsense | MTMR1:ENST00000445323.2:exon15:c.C1840T:p.P814S.MTMR1:ENST0000041926.1:exon15:c.C1547:p.P912S.MTMR1:ENST00000370390.3:exon14:c.C1816T:p.P906S.MTMR1:ENST0000044228.1:exon14:c.C1816T:p.P906S.                                                          |
| X | 151905076 | G | C | GAGTATAGTATGGATGAG   | exonic | XX | nonsense | MAGEA12:ENST00000357916.4:exon2:c.C225G:p.I75M.MAGEA12:ENST00000393900.3:exon3:c.C225G:p.I75M.MAGEA12:ENST00000393869.3:exon3:c.C225G:p.I75M.                                                                                                          |
| X | 15312458  | G | A | CCAGCAGGAGGACCTCAGG  | exonic | XX | nonsense | L1CAM:ENST00000538883.1:exon25:c.C3343T:p.P11155L.L1CAM:ENST00000543994.1:exon25:c.C3343T:p.P11155L.L1CAM:ENST00000370055.1:exon25:c.C3322T:p.P11085.L1CAM:ENST00000361981.3:exon24:c.C3322T:p.P11085.L1CAM:ENST00000370057.3:exon25:c.C3337T:p.I937Y. |
| X | 15504137  | G | C | CTCCAGTATATGAGACAA   | exonic | XX | nonsense | SPRY3:ENST00000302805.2:exon2:c.G904C:p.D209H.                                                                                                                                                                                                         |

=large\_intestine

c.13262C>AAChange-p.P4421t.tissue=lung

135G>AAChange-p.E379K.tissue=large\_intestine&NEK10\_ENST0000429845;basechange=c.1135G>AAChange-p.E379K.tissue=large\_intestine

je-c:5074G>A.AChange+p.D1692N:issue=lung

>T.AChange+p.V757F:issue=kidney

je-c:1282C>A.AChange+p.P428T:issue=lung

change>p.V181SF.tissue=lung

basechange=c.1638C>TAAchange=p.S613L.tissue=urinary\_tract

urinary\_tract

U>C.AAchange=p.N400H.tissue=large\_intestine&DCLK1\_ENST00000379893.basechange=c.277A>C.AAchange=p.N93H.tissue=large\_intestine

rg=c.3704C>TAAchange-p.S1235F.tissue=urinary\_tract.large\_intestine

>TAAchange-p.R309C.tissue=large\_intestine



| Chromosome | Position (hg) | Reference or db | Mutant Allele/Sequence context | ANNOVAR RefSeq | Mutation type | ANNOVAR output (alternative nomenclature) | Cytoband | COSMIC |
|------------|---------------|-----------------|--------------------------------|----------------|---------------|-------------------------------------------|----------|--------|
| 1          | 116343 G      | A               | CCTCTGCTGTAAAGCGGGGACT         | SNV            | SNV           | SNV                                       |          |        |
| 1          | 116841 G      | T               | CTGGGGCCCTGCTGGGGCCG           | SNV            | SNV           | SNV                                       |          |        |
| 1          | 123801F10     | A               | CCGACTCTCCGCTCTGCTGGCAG        | SNV            | SNV           | SNV                                       |          |        |
| 1          | 1410736T      | A               | TCCGACTTCTGCCCAACAGT           | SNV            | SNV           | SNV                                       |          |        |
| 1          | 162550C       | T               | AGCTGTAGTACTACTCTCCCT          | SNV            | SNV           | SNV                                       |          |        |
| 1          | 162561F1      | G               | GAAGAAGTCGCCCTTACTCT           | SNV            | SNV           | SNV                                       |          |        |
| 1          | 1626136C      | T               | GGCGCCACCATTACAGCTT            | SNV            | SNV           | SNV                                       |          |        |
| 1          | 1944780G      | T               | CAGGAGAGCAATCCAGCCAGC          | SNV            | SNV           | SNV                                       |          |        |
| 1          | 232620F1      | C               | CCAGCGGCTTTATATGCTGGA          | SNV            | SNV           | SNV                                       |          |        |
| 1          | 2381057G      | C               | TGACGGCCAGCAATCCGGCGGA         | SNV            | SNV           | SNV                                       |          |        |
| 1          | 241847A       | G               | GAGCAGAGCAATCCAGCCAGC          | SNV            | SNV           | SNV                                       |          |        |
| 1          | 256837G       | A               | CCGCTCCAGCAGCAATCCAGCA         | SNV            | SNV           | SNV                                       |          |        |
| 1          | 2828876G      | A               | TCTGTCTGCAAGGAAGCGCA           | SNV            | SNV           | SNV                                       |          |        |
| 1          | 2947586G      | T               | GGTCTTCCGCAATCTCATCTG          | SNV            | SNV           | SNV                                       |          |        |
| 1          | 332075F10     | T               | TCGAGAGTTTATTGATCTCTC          | SNV            | SNV           | SNV                                       |          |        |
| 1          | 3656370G      | A               | GGGGGTCCCGGGCCGGCGGGA          | SNV            | SNV           | SNV                                       |          |        |
| 1          | 4326185C      | T               | GCTGTCTCTGTATGTCTCAGG          | SNV            | SNV           | SNV                                       |          |        |
| 1          | 4365102A      | C               | GCAGAGAAATAGGCTAAGCC           | SNV            | SNV           | SNV                                       |          |        |
| 1          | 4365127A      | C               | CAAGTTCACATCAGCCCTCAT          | SNV            | SNV           | SNV                                       |          |        |
| 1          | 4368885G      | T               | GGTCTCTCTCTGGTGGGGCT           | SNV            | SNV           | SNV                                       |          |        |
| 1          | 4406965G      | A               | GGGAGGACCGGGCCATCAT            | SNV            | SNV           | SNV                                       |          |        |
| 1          | 526347C       | T               | CGTTTACAGAGGGCATCTCA           | SNV            | SNV           | SNV                                       |          |        |
| 1          | 5323665G      | T               | AAGCTTCTCTCAAGCCCAAG           | SNV            | SNV           | SNV                                       |          |        |
| 1          | 5447783A      | T               | GACAGGGCTCTAGTAAAGACT          | SNV            | SNV           | SNV                                       |          |        |
| 1          | 6049262A      | C               | AATCTCAACAGCACTCTGT            | SNV            | SNV           | SNV                                       |          |        |
| 1          | 7192007F10    | T               | TGCGTCTTATCTAGTACGCT           | SNV            | SNV           | SNV                                       |          |        |
| 1          | 9364571G      | T               | GGCAGATCTTGGCCCATCC            | SNV            | SNV           | SNV                                       |          |        |
| 1          | 11066997G     | A               | GGCTCAGCCCTACTGTAGGTCA         | SNV            | SNV           | SNV                                       |          |        |
| 1          | 12030182A     | T               | AAGCTCTCCCCTTCATATTG           | SNV            | SNV           | SNV                                       |          |        |
| 1          | 15403092G     | C               | TCGAACTGAACTGGATGGCTG          | SNV            | SNV           | SNV                                       |          |        |
| 1          | 15523320G     | T               | TGGACTCTTGGCCGGGCTT            | SNV            | SNV           | SNV                                       |          |        |
| 1          | 15664171T     | G               | TTTGAAGGAGTTCTCAATCTG          | SNV            | SNV           | SNV                                       |          |        |
| 1          | 15664171T     | T               | GGGCGGGCTCCAGCAGCCAGC          | SNV            | SNV           | SNV                                       |          |        |
| 1          | 15667178A     | T               | CGGCTGGGCTGCTTGGATCT           | SNV            | SNV           | SNV                                       |          |        |
| 1          | 15773833G     | C               | TCTTACGACAGATGTGATGC           | SNV            | SNV           | SNV                                       |          |        |
| 1          | 16177186A     | A               | CCCTTCCAGTATAGCCAGCAG          | SNV            | SNV           | SNV                                       |          |        |
| 1          | 16189249G     | C               | AGCTTCAGAGATCCAGCGCCA          | SNV            | SNV           | SNV                                       |          |        |
| 1          | 16262586C     | A               | TTTGAAGCAGCATATGATCTCA         | SNV            | SNV           | SNV                                       |          |        |
| 1          | 16951087C     | T               | TCTCACTGATCTTGGAGAAG           | SNV            | SNV           | SNV                                       |          |        |
| 1          | 17361681G     | C               | CTCAATAAATCTTCAATCTG           | SNV            | SNV           | SNV                                       |          |        |
| 1          | 17680392F10   | A               | GGCTCTGCTCTCAACTCTCTCC         | SNV            | SNV           | SNV                                       |          |        |
| 1          | 17902740G     | C               | GGAAGCTCACTAAACTACTCG          | SNV            | SNV           | SNV                                       |          |        |
| 1          | 18044140C     | T               | AGTTTATTAATCTGATCTGAT          | SNV            | SNV           | SNV                                       |          |        |
| 1          | 1826276F10    | A               | TGAGAGCTCTCACTCCAGCAC          | SNV            | SNV           | SNV                                       |          |        |
| 1          | 20103467T     | A               | CTCTCAGCCCTGGCCCTTGT           | SNV            | SNV           | SNV                                       |          |        |
| 1          | 20195996C     | T               | GAGAGAGGATCCAGCAAAAT           | SNV            | SNV           | SNV                                       |          |        |
| 1          | 20117523G     | A               | ATGGCTCTCTCAAGCAGTCT           | SNV            | SNV           | SNV                                       |          |        |
| 1          | 20182540A     | C               | ATATCTCTCTCATGCAATC            | SNV            | SNV           | SNV                                       |          |        |
| 1          | 20271981T     | T               | CTTACAGCCCTCCAGCAATAT          | SNV            | SNV           | SNV                                       |          |        |
| 1          | 20464852C     | T               | AGACAGCTCTACCTCTGGCT           | SNV            | SNV           | SNV                                       |          |        |
| 1          | 20512917F10   | T               | GAGGGCCAGCAAGGATGCCC           | SNV            | SNV           | SNV                                       |          |        |
| 1          | 20539436G     | T               | TTGAGAGCCCTCAGCACTGGC          | SNV            | SNV           | SNV                                       |          |        |
| 1          | 20987834A     | C               | GCAAGCAGGATTCAGCAGCC           | SNV            | SNV           | SNV                                       |          |        |
| 1          | 22262651C     | G               | CTTTGACTAATGCATTAACAC          | SNV            | SNV           | SNV                                       |          |        |
| 1          | 22664786C     | T               | CTGTTGGGATGATCCAGCCGAA         | SNV            | SNV           | SNV                                       |          |        |
| 1          | 23007181C     | G               | GATCAGGTTACATGCAGAGC           | SNV            | SNV           | SNV                                       |          |        |
| 1          | 2329790G      | A               | AGCATCTCACAGCATATGCT           | SNV            | SNV           | SNV                                       |          |        |
| 1          | 23294238C     | splicing        | AGCATCTCTCTAGAAATGGA           | SNV            | SNV           | SNV                                       |          |        |
| 1          | 24025595G     | C               | CTCCGGCGAATGACTCTGGA           | SNV            | SNV           | SNV                                       |          |        |
| 1          | 24795846C     | T               | TTTGAAGCTTCCAGCCGAGCA          | SNV            | SNV           | SNV                                       |          |        |
| 1          | 271346T       | G               | AGAACAGCCGAACTGAGAGCA          | SNV            | SNV           | SNV                                       |          |        |
| 1          | 282958G       | T               | TCTCTGGGCTGGCTCTCAC            | SNV            | SNV           | SNV                                       |          |        |
| 1          | 2841432A      | A               | TTTCTGAGAAAGAGAGAGACA          | SNV            | SNV           | SNV                                       |          |        |
| 1          | 2732422G      | T               | GTTCCCTGCAAGTCTGGCT            | SNV            | SNV           | SNV                                       |          |        |
| 1          | 2772400F10    | G               | TGAGCGTCCCTCTGGCGAGG           | SNV            | SNV           | SNV                                       |          |        |
| 1          | 37193648G     | T               | TTGAGAGCCCTCAGCACTGGC          | SNV            | SNV           | SNV                                       |          |        |
| 1          | 44428113C     | C               | ATACAGCCTGTAAATGTTGCA          | SNV            | SNV           | SNV                                       |          |        |
| 1          | 45260374C     | A               | GTCAGCTCAAGCTCTGCGTGA          | SNV            | SNV           | SNV                                       |          |        |
| 1          | 5517778F10    | A               | CTGCTGCTCTACACAGCTTT           | SNV            | SNV           | SNV                                       |          |        |
| 1          | 5617867F10    | C               | GGAAGCAGGCGGATGACT             | SNV            | SNV           | SNV                                       |          |        |
| 1          | 5136232T      | C               | AAGATCTGCAATCTCTAAC            | SNV            | SNV           | SNV                                       |          |        |
| 1          | 5146196C      | T               | TGAGAGACGGAATGCAAGCT           | SNV            | SNV           | SNV                                       |          |        |
| 1          | 52497318C     | T               | CTGCTCTCAATGGCTTTT             | SNV            | SNV           | SNV                                       |          |        |
| 1          | 5366442T      | A               | TTTCTGAGAAATATCTTCT            | SNV            | SNV           | SNV                                       |          |        |
| 1          | 54954293G     | T               | TTTCTGAGCAAACTCTCCAG           | SNV            | SNV           | SNV                                       |          |        |
| 1          | 56591608C     | T               | TCTGAGGAAATCCATCTCT            | SNV            | SNV           | SNV                                       |          |        |
| 1          | 56581011G     | T               | GGAAGCAACTATCCAGCTGG           | SNV            | SNV           | SNV                                       |          |        |
| 1          | 57021189G     | T               | CGGGCGGCGAGCGCCGGGCT           | SNV            | SNV           | SNV                                       |          |        |
| 1          | 58081026C     | A               | GTTTTTCTGCTCTCTTCTC            | SNV            | SNV           | SNV                                       |          |        |
| 1          | 59132923C     | T               | TAGCAGAAATAGGAGCAGG            | SNV            | SNV           | SNV                                       |          |        |
| 1          | 20326297G     | A               | AGCCAAAGAGAGAGAAGG             | SNV            | SNV           | SNV                                       |          |        |
| 1          | 2115590F10    | T               | GGTCTCTTCTTTGGAATGG            | SNV            | SNV           | SNV                                       |          |        |
| 1          | 21193302C     | T               | AGAGCTCAAGCTGATGAGCT           | SNV            | SNV           | SNV                                       |          |        |
| 1          | 21949283G     | A               | TGGATGATAGTGGAGCACT            | SNV            | SNV           | SNV                                       |          |        |
| 1          | 23469494C     | T               | AGCTCCATGAGCTGGGACT            | SNV            | SNV           | SNV                                       |          |        |
| 1          | 24292311T     | T               | CTGTCTCTGGTGGCCAGCA            | SNV            | SNV           | SNV                                       |          |        |
| 1          | 3915778A      | A               | AGTTAAAGATCCAGCGGACT           | SNV            | SNV           | SNV                                       |          |        |
| 1          | 4263869C      | B               | TTCTGTGAGCTCTCATCCAG           | SNV            | SNV           | SNV                                       |          |        |
| 1          | 4472584G      | A               | GAGCTGTGTTGAAGGTGGG            | SNV            | SNV           | SNV                                       |          |        |
| 1          | 3703369A      | G               | TATCGCTCCCTCTTGTGAAA           | SNV            | SNV           | SNV                                       |          |        |
| 1          | 38729648A     | T               | GATCGCTGGATCTGGAGGCC           | SNV            | SNV           | SNV                                       |          |        |
| 1          | 4278470G      | C               | GATAGAGACTCTGAAGCTGT           | SNV            | SNV           | SNV                                       |          |        |
| 1          | 4428494A      | T               | TCCACATGAAAATAAATAA            | SNV            | SNV           | SNV                                       |          |        |
| 1          | 4566552G      | T               | CCCGCCGCTTGGATGCTTT            | SNV            | SNV           | SNV                                       |          |        |
| 1          | 4566529A      | T               | TCCAGGAGGCTCTATTTCTC           | SNV            | SNV           | SNV                                       |          |        |
| 1          | 4744651C      | G               | ATCTGATCTAGCACCACTG            | SNV            | SNV           | SNV                                       |          |        |
| 1          | 4871631G      | T               | CCACCCCTCTTTCAGGAGCA           | SNV            | SNV           | SNV                                       |          |        |
| 1          | 4965320F10    | C               | TGTACCTGGGCTGTAGAGAG           | SNV            | SNV           | SNV                                       |          |        |
| 1          | 4989460G      | B               | GTTCTCTCTGCGCAGCAAGT           | SNV            | SNV           | SNV                                       |          |        |
| 1          | 4975648G      | C               | AGCTCCGACTCCAGCGGGCA           | SNV            | SNV           | SNV                                       |          |        |
| 1          | 4982378G      | A               | CTCTTACGGCTCTGGTCTGCG          | SNV            | SNV           | SNV                                       |          |        |
| 1          | 5164096C      | A               | ACTGCGCAAAAGGTTCTCT            | SNV            | SNV           | SNV                                       |          |        |
| 1          | 5384274C      | A               | GTTCCGCTGTCTCATCTCT            | SNV            | SNV           | SNV                                       |          |        |
| 1          | 5724571G      | T               | TAAGAAAGCAATCCAGAGC            | SNV            | SNV           | SNV                                       |          |        |
| 1          | 8546484C      | C               | TGTATATTTAATGCACTCT            | SNV            | SNV           | SNV                                       |          |        |
| 1          | 11272469A     | G               | GTACATGTTGAGTCTCCAC            | SNV            | SNV           | SNV                                       |          |        |
| 1          | 1193191F10    | T               | AGATCAACTCAACTGAGCT            | SNV            | SNV           | SNV                                       |          |        |
| 1          | 11928990C     | T               | AGCAGAGGCTGGTCAAGGTT           | SNV            | SNV           | SNV                                       |          |        |
| 1          | 12148178F10   | T               | GATGATGATCTAGTAAACT            | SNV            | SNV           | SNV                                       |          |        |
| 1          | 1357161A      | A               | CAAAATATGAGGCAACTGCTA          | SNV            | SNV           | SNV                                       |          |        |
| 1          | 14030721T     | C               | AAAGAAATAATCAACTACAC           | SNV            | SNV           | SNV                                       |          |        |
| 1          | 14116322A     | A               | TCCATCACTAAGGAAAGGAA           | SNV            | SNV           | SNV                                       |          |        |
| 1          | 14116354G     | A               | TCCATCACTAAGGAAAGGAA           | SNV            | SNV           | SNV                                       |          |        |
| 1          | 14215379F10   | T               | TGCTCAACTTATCAACTTCA           | SNV            | SNV           | SNV                                       |          |        |
| 1          | 14630754C     | T               | AGCATGATTAATACTGACAC           | SNV            | SNV           | SNV                                       |          |        |
| 1          | 15106612T     | A               | AATGCCAGCAAGCAGCAGC            | SNV            | SNV           | SNV                                       |          |        |
| 1          | 15106624G     | A               | AAATGGCTCTGGTCTCTG             | SNV            | SNV           | SNV                                       |          |        |
| 1          | 15623863G     | T               | AGCTTCTCACCTCCAGCAGC           | SNV            | SNV           | SNV                                       |          |        |
| 1          | 15653976C     | T               | AGCAGCAGCACTTGTCTCC            | SNV            | SNV           | SNV                                       |          |        |
| 1          | 16470168T     | A               | TTCAGCAGGAGTCTCTCTCT           | SNV            | SNV           | SNV                                       |          |        |
| 1          | 16480666C     | T               | TGAAGAACCAACTGCTCTCT           | SNV            | SNV           | SNV                                       |          |        |
| 1          | 17283542G     | T               | TTTCTGTCTTGTATTTCT             | SNV            | SNV           | SNV                                       |          |        |
| 1          | 17324279G     | T               | CCCATTTACTCTTATGATTT           | SNV            | SNV           | SNV                                       |          |        |
| 1          | 18644335A     | T               | GATATATCTGCTTATAGAGC           | SNV            | SNV           | SNV                                       |          |        |
| 1          | 19418658A     | C               | TACTTATTATTAATGCTTAT           | SNV            | SNV           | SNV                                       |          |        |
| 1          | 2267022C      | T               | CCAGCCAGCGTCCCGGGCT            | SNV            | SNV           | SNV                                       |          |        |
| 1          | 303919T       | C               | CAGTCTCCGGTGGTGAAGGG           | SNV            | SNV           | SNV                                       |          |        |
| 1          | 5570268A      | A               | GCCAGCAGCTAGCTGTGAG            | SNV            | SNV           | SNV                                       |          |        |
| 1          | 563835C       | T               | CTATTCCTCTCTATATCCG            | SNV            | SNV           | SNV                                       |          |        |
| 1          | 6302919G      | A               | CTTCTTCACTCAGCAACTC            | SNV            | SNV           | SNV                                       |          |        |
| 1          | 7275559G      | A               | AGGCCAGCACTAGGCCGCT            | SNV            | SNV           | SNV                                       |          |        |
| 1          | 1301331G      | A               | CAGCGCAGCCCTTCTTGGC            | SNV            | SNV           | SNV                                       |          |        |
| 1          | 37488730G     | T               | TTTCTATTTAGGTAGGTTG            | SNV            | SNV           | SNV                                       |          |        |
| 1          | 3844856C      | T               | GGGACTGCGGGAAGCCCGC            | SNV            | SNV           | SNV                                       |          |        |
| 1          | 4162265G      | T               | GAGCCCTCTATGCTGGGTT            | SNV            | SNV           | SNV                                       |          |        |
| 1          | 4248787C      | T               | AAGGATAGTAAAGTCAAGCT           | SNV            | SNV           | SNV                                       |          |        |
| 1          | 42571221G     | C               | TACAGGCACTGCTTCAAGAA           | SNV            | SNV           | SNV                                       |          |        |
| 1          | 4784754T      | A               | TGCTTATCACTGAGCAGGAG           | SNV            | SNV           | SNV                                       |          |        |
| 1          | 4788793G      | C               | TCCATGACAGAGGAGGACAC           | SNV            | SNV           | SNV                                       |          |        |
| 1          | 71495242G     | A               | GTCGAGGCTTCAACTCTCTT           | SNV            | SNV           | SNV                                       |          |        |
| 1          | 8563962A      | T               | CTCACTGGTCTAGGCGCT             | SNV            | SNV           | SNV                                       |          |        |
| 1          | 96104115C     | G               | ACAGATTGTAAACAGAGCTC           | SNV            | SNV           | SNV                                       |          |        |
| 1          | 9676904G      | T               | TATCTCTCTGCTAAAGGTC            | SNV            | SNV           | SNV                                       |          |        |
| 1          | 1005704       |                 |                                |                |               |                                           |          |        |













196?issue=ovary.breast.stomach.haematopoietic\_and\_lymphoid\_tissue.urinary\_tract.kidney.pancreas.liver.oesophagus.skin.lung.upper\_aerodigestive\_tract.large\_intestine.central\_nervous\_system.biliary\_tract&TP53\_ENST00000269305.basecharge=c.586C>T.AAchange+p.R119?issue=breast.stomach.haematopoietic\_and\_lymphoid\_tissue.oesophagus.lung.upper\_aerodigestive\_tract.large\_intestine.central\_nervous\_system.biliary\_tract&TP53\_ENST00000455263.basecharge=c.586C>T.AAchange+p.R119?issue=stomach.lung.large\_intestine&TP53\_ENST00000413465.basecharge=c.586C>T.AAchange+p.R119?issue=breast.haematopoietic\_and\_lymphoid\_tissue.stomach.oesophagus.lung.upper\_aerodigestive\_tract.large\_intestine





Supplemental Table 4

| cytoband             | 1q21.3                   | 8q24.3                   | 7p22.1                                          | 21q22.3                                                                                                                                                                           |
|----------------------|--------------------------|--------------------------|-------------------------------------------------|-----------------------------------------------------------------------------------------------------------------------------------------------------------------------------------|
| q value              | 0,0006579                | 0,0006579                | 0,091895                                        | 0,091895                                                                                                                                                                          |
| residual q value     | 0,0006579                | 0,0006579                | 0,091895                                        | 0,091895                                                                                                                                                                          |
| wide peak boundaries | chr1:152265562-152329851 | chr8:144980719-145001933 | chr7:6744791-6864178                            | chr21:45953569-46082924                                                                                                                                                           |
| genes in wide peak   | FLG<br>FLG2              | PLEC                     | ZNF12<br>CCZ1B<br>RSPH10B<br>PMS2CL<br>RSPH10B2 | TSPEAR<br>KRTAP10-10<br>KRTAP10-4<br>KRTAP10-6<br>KRTAP10-7<br>KRTAP10-9<br>KRTAP10-1<br>KRTAP10-11<br>KRTAP10-2<br>KRTAP10-5<br>KRTAP10-8<br>KRTAP10-3<br>KRTAP12-3<br>KRTAP12-4 |



|            |                              |                              |                              |                              |                             |                              |                            |                             |                                                                    |                                |                                                                                                                         |                             |                                                                                                                         |                                                                           |                            |
|------------|------------------------------|------------------------------|------------------------------|------------------------------|-----------------------------|------------------------------|----------------------------|-----------------------------|--------------------------------------------------------------------|--------------------------------|-------------------------------------------------------------------------------------------------------------------------|-----------------------------|-------------------------------------------------------------------------------------------------------------------------|---------------------------------------------------------------------------|----------------------------|
| cytoband   | 5q22.2                       | 2q32.2                       | 2q36.3                       | 9q22.33                      | 15q21.1                     | 1p21.1                       | 6q13                       | 10q23.31                    | 12q24.33                                                           | 3p24.1                         | 4q13.3                                                                                                                  | 13q13.1                     | 22q11.21                                                                                                                | 10p12.33                                                                  | 1p22.3                     |
| q value    | 1,6726E-08                   | 1,6726E-08                   | 0,000072259                  | 0,00081909                   | 0,0021785                   | 0,0044551                    | 0,0062561                  | 0,0062561                   | 0,013069                                                           | 0,013306                       | 0,029455                                                                                                                | 0,041181                    | 0,060988                                                                                                                | 0,085556                                                                  | 0,099783                   |
| residual   |                              |                              |                              |                              |                             |                              |                            |                             |                                                                    |                                |                                                                                                                         |                             |                                                                                                                         |                                                                           |                            |
| q value    | 1,6726E-08                   | 1,7698E-08                   | 0,00042243                   | 0,00081909                   | 0,0021785                   | 0,0044551                    | 0,0062561                  | 0,0062561                   | 0,013069                                                           | 0,013306                       | 0,029354                                                                                                                | 0,041181                    | 0,060988                                                                                                                | 0,085556                                                                  | 0,10347                    |
| wide       |                              |                              |                              |                              |                             |                              |                            |                             |                                                                    |                                |                                                                                                                         |                             |                                                                                                                         |                                                                           |                            |
| peak       |                              |                              |                              |                              |                             |                              |                            |                             |                                                                    |                                |                                                                                                                         |                             |                                                                                                                         |                                                                           |                            |
| boundaries | chr5:1117476<br>67-112200958 | chr2:1898768<br>82-190014430 | chr2:2278531<br>64-228192407 | chr9:1018295<br>55-101983418 | chr15:486301<br>95-49034995 | chr1:1024540<br>27-104074629 | chr6:705027<br>82-71133026 | chr10:896112<br>76-90034788 | chr12:1334576<br>37-133851895                                      | chr3:300433<br>44-31205400     | chr4:706207<br>36-71204641                                                                                              | chr13:328757<br>88-32993270 | chr22:213807<br>10-21922059                                                                                             | chr10:177546<br>11-18292099                                               | chr1:861667<br>05-86820520 |
| genes in   |                              |                              |                              |                              |                             |                              |                            |                             |                                                                    |                                |                                                                                                                         |                             |                                                                                                                         |                                                                           |                            |
| wide       |                              |                              |                              |                              |                             |                              |                            |                             |                                                                    |                                |                                                                                                                         |                             |                                                                                                                         |                                                                           |                            |
| peak       | APC<br>FLJ11235              | hsa-mir-3129<br>MIR3129      | COL4A3<br>COL4A4             | TGFBR1                       | FBN1                        | COL11A1                      | COL9A1<br>COL19A1          | PTEN<br>KLLN                | ZNF10<br>ZNF26<br>ZNF84<br>ZNF140<br>ZNF268<br>LOC647589<br>ZNF605 | hsa-mir-466<br>TGFBR2<br>GADL1 | CSN1S1<br>CSN2<br>CSN3<br>HTN1<br>HTN3<br>STATH<br>SULT1E1<br>ODAM<br>CABS1<br>FDCSP<br>CSN1S2AP<br>C4orf40<br>CSN1S2BP | BRCA2<br>ZAR1L              | hsa-mir-649<br>SLC7A4<br>HIC2<br>POM121L8P<br>RIMBP3C<br>PI4KAP2<br>LOC400891<br>BCRP2<br>P2RX6P<br>RIMBP3B<br>TMEM191C | hsa-mir-511-2<br>hsa-mir-511-1<br>MRC1<br>MIR511-1<br>MIR511-2<br>TMEM236 | COL24A1                    |

Supplemental Table 5

|                    | AC1 | AC2 | AC3 | AC4 | AC6 | AC7 | AC8 | AC11 | AC12 | AC13 | AC14 | AC17 | AC19 | AC21 | AC23 | AC25 | AC27 | AC29 | AC30 |
|--------------------|-----|-----|-----|-----|-----|-----|-----|------|------|------|------|------|------|------|------|------|------|------|------|
| <b>C000-6KNGDL</b> |     |     |     |     |     | 60  |     | 25   |      |      |      |      | 15   |      |      |      |      |      |      |
| <b>C000-X88E7Z</b> |     | 17  |     |     |     | 39  |     | 17   |      | 26   |      |      |      |      |      |      |      |      |      |
| <b>C000-RCWM1J</b> |     |     |     | 7   |     | 52  |     | 41   |      |      |      |      |      |      |      |      |      |      |      |
| <b>C000-EXKBCS</b> |     |     |     | 15  |     | 49  |     | 29   |      |      |      |      |      |      | 7    |      |      |      |      |
| <b>C000-HZGGV2</b> |     | 5   |     | 5   |     | 49  |     | 32   |      | 7    |      | 2    |      |      |      |      |      |      |      |
| <b>C000-ESMKCH</b> |     |     |     | 15  |     | 41  |     | 44   |      |      |      |      |      |      |      |      |      |      |      |
| <b>C000-S5ZHWR</b> |     | 7   |     |     |     | 40  |     | 31   |      | 12   |      | 10   |      |      |      |      |      |      |      |
| <b>C000-2SXE39</b> |     |     | 30  | 30  |     |     |     |      |      | 4    |      |      | 11   | 9    |      | 12   | 3    |      |      |
| <b>C000-ZZP8UU</b> | 5   | 15  | 66  |     |     |     |     |      |      |      |      |      | 11   |      |      |      | 4    |      |      |
| <b>C000-CFLP5N</b> | 4   | 11  | 44  |     |     | 6   |     | 16   |      |      |      |      | 8    |      |      |      |      |      | 10   |
| <b>C000-JMUDMJ</b> |     | 16  |     |     |     | 28  |     | 22   |      | 20   |      |      |      | 13   |      |      |      |      |      |
| <b>C000-648QQH</b> | 4   | 11  | 18  |     | 6   | 9   | 26  |      | 27   |      |      |      |      |      |      |      |      |      |      |
| <b>C000-W91YB6</b> | 43  | 10  |     |     |     |     |     | 16   |      | 31   |      |      |      |      |      |      |      |      |      |
| <b>C000-AX1WLG</b> |     |     |     |     |     | 61  |     |      |      | 9    | 8    |      |      |      |      |      |      | 22   |      |

Relative signature contributions (% of SNVs attributed to the signature)
